# Supplementary material for: Identifying Children at Risk of High Myopia Using Population Centile Curves of Refraction
Source: PLoS One. 2016 Dec 28;11(12):e0167642. doi: 10.1371/journal.pone.0167642 (PMC5193395; doi:10.1371/journal.pone.0167642)
Supplement: S1 File — (XLSX) [file pone.0167642.s001.xlsx]

## Sheet: Sheet1
sex	auto_seod	id	age
1	0.5	80070011	15
1	0.5	80070012	9
1	-3.875	80070031	12
1	0.375	80070041	6
2	-0.125	80070051	11
1	0.125	80070061	5
1	-0.875	80070071	15
1	-3.625	80070081	15
2	0.875	80070091	8
2	0.625	80070111	5
1	1.25	80070121	5
2	1.25	80070131	7
2	-3.125	80070141	9
2	0.875	80070151	5
2		80070171	5
1	1.375	80070181	6
2	0	80070191	10
1	1	80070201	6
2	1.375	80070211	10
1	0.875	80070221	5
2	-4.875	80070231	10
2	1.125	80070241	5
1	-0.375	80070251	15
2		80070271	5
2	-0.25	80070281	13
2	-0.125	80070291	10
2	-1.625	80070301	15
1	1.625	80070311	5
2	-1	80070321	13
2	1.25	80070331	15
2	1.5	80070341	8
1	0.125	80070351	8
2	-1.25	80070361	13
1	0	80070381	7
1	-3.875	80070401	11
1	-3.25	80070411	11
1	1.625	80070421	5
2	-1.25	80070431	10
1	1.375	80070441	13
2	-0.25	80070451	8
1	-3.75	80070481	15
1	0.5	80070491	6
1	0.625	80070501	14
1	0.75	80070521	5
1	0.25	80070531	10
2	0.5	80070541	9
2	-1	80070561	13
1	2.125	80070571	5
1	0	80070581	9
1	0.125	80070591	10
2	1.375	80070601	8
2	0.375	80070611	7
2	0.75	80070621	8
1	0.625	80070631	7
1	0.625	80070641	7
2	1.875	80070651	15
2	-4.625	80070661	12
1	1	80070662	7
1	-0.5	80070671	15
1	0.625	80070701	15
2	-2.125	80070711	15
2	1.875	80070721	5
2	1.375	80070741	10
2	-0.75	80070751	12
2	-0.125	80070771	11
2	-1.25	80070781	11
1	0.125	80070791	6
2	0.75	80070801	10
1	0.125	80070811	14
1	0.75	80070821	9
2	-3	80070831	12
1	1.25	80070841	6
2	0.75	80070851	6
1	0.375	80070871	7
2	1.875	80070881	13
1	1.25	80070891	8
2	0	80070921	8
2	0.625	80070922	8
1	-0.375	80070941	10
1	3.375	80070951	10
2	-2.25	80070961	11
1	0.75	80070971	9
1	-4.875	80070981	15
2	0.25	80070992	12
1	0.875	80071001	11
2	0.625	80071011	10
1	-3.125	80071021	14
1	-2.5	80071041	12
1	0.125	80071061	12
2	0.125	80071071	7
2	-4	80071091	14
1	0	80071101	11
1	1.375	80071111	12
1	1.25	80071121	12
1	0	80071131	12
1	1.625	80071151	14
1	1.625	80071161	5
2	-4.125	80071171	13
2	-0.125	80071181	11
1	1.375	80071191	11
2	0.375	80071201	9
1	1	80071211	10
2	-1.125	80071221	15
2	0.25	80071231	14
1	1	80071242	9
2	-1.75	80071251	15
2	-0.875	80071261	14
2	-0.25	80071271	15
1	-1	80071281	13
2	0.625	80071291	10
1	-2.375	80071301	14
1	-0.5	80071321	11
2	0.5	80071331	7
1	-3	80071341	12
1	0	80071351	13
1	0.5	80071361	14
1	1.125	80071371	11
1	-0.125	80071381	13
1	0.75	80071391	13
2	1.25	80071401	5
1	-0.375	80071411	12
2	0.375	80071421	9
2	-1.25	80071431	8
2	-1.125	80071441	14
2	-1	80071451	13
1	0.25	80071461	10
1	0.625	80071462	8
1	1.25	80071471	11
2	0.875	80071481	12
1	-1.875	80071491	13
1	0.75	80071501	7
2	0.625	80071511	7
1	3.875	80071521	8
1	-12	80071531	13
1	-1.125	80071541	13
1	-0.25	80071551	11
2	-5.5	80071561	14
1	-5	80071571	12
1	0.875	80071581	13
2	-7.625	80071591	9
2	-3.125	80071601	15
2	-2.5	80071611	11
1	0.375	80071612	9
1	1.375	120100000	5
1	1.625	120100000	6
1	0.375	120100000	8
2	0.375	120100000	7
2	-2	120100000	10
1	0.75	120100000	10
1	1.75	120100000	5
1	0.375	120100000	5
2	-0.75	120100000	11
1	1.375	120100000	7
1	0.5	120100000	8
1	-0.625	120100000	8
2	0.75	120100000	9
2	1.375	120100000	6
1	-0.625	120100000	10
2	-0.5	120100000	10
1	0	120100000	6
2	0.875	120100000	8
2	1	120100000	7
1	2	120100000	6
1	0.125	120100000	7
1	0.125	120100000	9
2	1.125	120100000	6
1	-2	120100000	7
1	0.625	120100000	12
1	1.375	120100000	5
2	1	120100000	6
2	0.625	120100000	6
2	-3.625	120100000	8
2	1.5	120100000	7
1	0.25	120100000	10
2	0.75	120100000	5
2	1.125	120100000	6
1	0.625	120100000	7
2	-0.375	120100000	11
2	1.25	120100000	7
1	-2.375	120100000	13
1	-0.25	120100000	7
2	-0.25	120100000	8
2	1	120100000	6
1	0.75	120100000	6
1	-3.375	120100000	13
1	-3.375	120100000	11
2	-1.5	120100000	11
1	-0.25	120100000	14
1	1.25	120100000	10
2	0.75	120100000	11
1	-3	120100000	13
2	0.75	120100000	9
1	1.375	120100000	10
1	0.75	120100000	8
2	-3.125	120100000	12
2	-0.25	120100000	10
1	-2	120100000	12
1	0	120100000	8
2	-1.125	120100000	13
2	-1.25	120100000	12
1	-4.875	120100000	12
2	-2.375	120100000	11
1	-2.375	120100000	10
1	-0.125	120100000	13
1	-1.75	120100000	6
1	-3.375	120100000	14
2	1.125	120100000	12
1	0.75	120100000	5
2	-1.625	120100000	15
1	0.875	120100000	11
2	0.25	120100000	8
1	0.125	120100000	11
1	1.375	120100000	11
2	-2	120100000	13
1	0.875	120100000	7
2	0.75	120100000	12
1	0.5	120100000	7
1	1	120100000	9
1	-0.125	120100000	13
2	-2.125	120100000	14
2	1	120100000	8
1	-0.375	120100000	11
1	1.125	120100000	5
1	0	120100000	9
2	0.125	120100000	8
1	1.5	120100000	7
1	1	120100000	6
2	0.25	120100000	11
2	0.125	120100000	6
1	0.75	120100000	7
1	-0.625	120100000	14
1	-1.375	120100000	13
2	-0.375	120100000	10
1	-0.125	120100000	9
1	0.75	120100000	6
2	1.125	120100000	12
2	0	120100000	11
2	0.375	120100000	8
1	2.75	120100000	6
1	-0.25	120100000	12
1	0.625	120100000	7
1	-0.625	120100000	10
1	0.875	120100000	10
2	1.125	120100000	6
2	-0.875	120100000	7
1	1	120100000	5
1	-5.125	120100000	12
1	-2.75	120100000	15
2	0.125	120100000	11
1	0.75	120100000	15
1	0.5	120100000	13
1	0.125	120100000	15
2	0.25	120100000	7
1	-1.125	120100000	9
2	0.75	120100000	14
1	0.25	120100000	13
1	0.5	120100000	13
2	-2.5	120100000	14
2	-4.25	120100000	13
1	-0.125	120100000	10
2	1.5	120100000	6
2	-10.75	120100000	13
2	-6.875	120100000	12
1	-3.125	120100000	14
2	0.375	120100000	5
2	0.125	120100000	12
2	-1.25	120100000	9
2	-0.125	120100000	15
2	-1	120100000	12
1	-0.375	120100000	14
1	-2.5	120100000	13
1	-0.25	120100000	14
2	0.625	120100000	9
2	2.625	120100000	12
2	-2.125	120100000	13
1	-0.125	120100000	10
1	1.125	120100000	5
2	-1.25	120100000	13
1	-3.25	120100000	14
2	1.375	120100000	8
1	0.5	120100000	10
1	1	120100000	6
1	1.625	120100000	8
1	1	120100000	5
2	-0.375	120100000	9
1	0	120100000	10
1	-0.125	120100000	11
1	-1.75	120100000	11
2	-3.75	120100000	8
2	-1.375	120100000	8
2	-2.625	120100000	12
1	-2.125	120100000	11
1	0.75	120100000	8
2	-0.125	120100000	5
2	0.5	120100000	14
1	0.25	120100000	14
2	-0.125	120100000	6
1	1.375	120100000	5
2	2.375	120100000	14
2	1.375	120100000	8
1	0.25	120100000	9
1	2.375	120100000	9
2	1.125	120100000	6
1	-0.75	120100000	14
2	0.75	120100000	6
1	0.625	120100000	9
1	1	120100000	13
1	-5.25	120100000	14
2	0.125	120100000	14
2	-2.375	120100000	14
2	0.625	120100000	8
1	-0.25	120100000	7
1	-1	120100000	15
1	1.125	120100000	5
2	-3.5	120100000	14
1	1.375	120100000	6
2	2.625	120100000	11
1	3.625	120100000	9
2	0.375	120100000	8
2	1.5	120100000	6
2	0.875	120100000	6
2	-0.5	120100000	9
2	0.125	120100000	11
1	-1.25	120100000	8
1	-0.25	120100000	12
1	-1.625	120100000	8
2	-0.875	120100000	7
2	0	120100000	9
1	2	120100000	6
2	0.5	120100000	11
2	1.625	120100000	6
1	0	120100000	6
2	-6.375	120100000	12
1	-1.75	120100000	10
2	0.875	120100000	7
2	-0.5	120100000	12
1	1.875	120100000	11
1	0.625	120100000	9
2	0.625	120100000	6
2	0.25	120100000	14
1	-0.125	120100000	11
1	1.125	290100000	7
1	1.875	290100000	5
2	0.75	290100000	6
2	0.125	290100000	6
1	1.5	290100000	7
2	0.375	290100000	13
2	1	290100000	11
2	1.25	290100000	9
2	0.875	290100000	8
1	0.125	290100000	14
2	-2.5	290100000	14
2	-3.75	290100000	15
2	0.375	290100000	11
2	0.75	290100000	5
1	-3.125	290100000	11
1	0.375	290100000	13
1	-0.5	290100000	12
1	0.875	290100000	5
2	-0.375	290100000	13
1	0.5	290100000	12
1	0.25	290100000	11
1	2.125	290100000	10
2	-2.75	290100000	13
1	-6.25	290100000	15
2	2.125	290100000	5
2	-2.625	290100000	14
1	1.125	290100000	9
1	-2	290100000	9
1	0.875	290100000	13
1	0.875	290100000	13
2	1.75	290100000	5
1	0.5	290100000	13
1	0.125	290100000	12
1	0.125	290100000	14
2	-0.375	290100000	12
2	0.125	290100000	11
1	0.375	290100000	9
1	1.25	290100000	6
2	-2	290100000	14
1	-2.25	290100000	14
2	0.375	290100000	8
1	0.5	290100000	11
1	-2.75	290100000	14
1	0.875	290100000	8
1	-0.5	290100000	11
1	0.5	290100000	9
1	2.5	290100000	5
1	0.5	290100000	9
2	0.625	290100000	14
2	-5.125	290100000	13
1	0.5	290100000	8
2	1.625	290100000	5
1	-2.375	290100000	15
2	-0.875	290100000	7
1	-3.75	290100000	14
1	0.875	290100000	8
1	-0.375	290100000	7
2	0.5	290100000	8
1	0.375	290100000	11
2	0.5	290100000	9
2	0.125	290100000	9
2	-2.625	290100000	15
2	1	290100000	5
2	-0.875	290100000	8
2	0.375	290100000	8
1	-2.75	290100000	6
1	0.75	290100000	11
2	-2.375	290100000	14
1	0.75	290100000	10
2	-0.25	290100000	12
1	-0.625	290100000	9
1	-2.75	290100000	14
1	-1.5	290100000	13
2	0.75	290100000	10
1	0.5	290100000	9
1	-2.125	290100000	12
1	-2.625	290100000	15
1	-2.25	290100000	12
1	-0.625	290100000	13
1	-0.625	290100000	15
1	0.375	290100000	7
2	-2.625	290100000	15
2	-3	290100000	13
2	0.25	290100000	14
2	0	290100000	14
2	-1	290100000	13
2	1.375	290100000	7
1	0.75	290100000	13
2	-5.375	290100000	15
2	1.375	290100000	8
2	-1.75	290100000	15
1	0.125	290100000	7
2	0.125	290100000	8
1	0.875	290100000	6
2	-1.875	290100000	14
2	1.5	290100000	7
2	1.375	290100000	10
1	0.875	290100000	5
2	1	290100000	6
2	-0.375	290100000	10
2	-2.625	290100000	15
2	0.875	290100000	10
2	-0.25	290100000	13
2	0.125	290100000	12
2	-1.75	290100000	12
2	-2.5	290100000	15
1	-1	290100000	9
2	1.875	290100000	12
2	-0.625	290100000	13
1	0.625	290100000	7
1	-4.375	290100000	13
2	0.125	290100000	11
2	0.375	290100000	9
2	1.625	290100000	5
2	2.125	340100000	6
1	-3.625	340100000	11
1	-1.375	340100000	13
2	0.125	340100000	11
2	-0.375	340100000	12
1	1.75	340100000	5
2	0.125	340100000	5
1	1.125	340100000	9
1	1.125	340100000	6
1	0.875	340100000	9
2	-0.625	340100000	13
2	-3.625	340100000	11
1	0.875	340100000	15
2	-2.25	340100000	13
1	-0.125	340100000	8
2	-2.375	340100000	8
2	-8.625	340100000	14
1	1	340100000	7
1	1.375	340100000	8
1	-0.5	340100000	13
2	-0.875	340100000	10
2	-0.25	340100000	12
1	-1.5	340100000	11
1	1	340100000	12
2	-2.875	340100000	15
1	1	340100000	6
1	0.75	340100000	12
1	1	340100000	11
1	3.875	340100000	6
1	-0.125	340100000	11
2	0.875	340100000	6
1	-0.125	340100000	11
2	-3.875	340100000	14
1	0.625	340100000	11
1	0.5	340100000	7
2	1.5	340100000	8
2	-2.5	340100000	11
1	0.25	340100000	11
1	0.25	340100000	9
1	-1.5	340100000	14
1	-0.125	340100000	10
1	0.375	340100000	13
1	0.625	340100000	7
1	0.625	340100000	7
2	-0.75	340100000	13
1	-0.5	340100000	12
1	-0.125	340100000	15
1	-3.25	340100000	14
2	-4.375	340100000	15
1	-0.25	340100000	12
2	-2.375	340100000	15
1	-2.75	340100000	15
1	-1.375	340100000	15
1	-0.625	340100000	10
1	0.125	340100000	13
1	-1.25	340100000	14
2	-1	340100000	13
1	0.25	340100000	13
1	2.25	340100000	7
1	0.75	340100000	7
1	-2.25	340100000	13
2	0.125	340100000	9
1	0	340100000	14
2	0.125	340100000	12
1	1.125	340100000	9
2	2.25	340100000	11
1	-1	340100000	15
2	-1.625	340100000	11
1	1	340100000	5
1	-0.125	340100000	8
1	-2.375	340100000	11
2	3.625	340100000	11
2	-1.125	340100000	9
2	0.75	340100000	10
2	1.125	340100000	9
1	-1.5	340100000	15
2	-2.5	340100000	12
2	-4.5	340100000	14
1	-0.125	340100000	7
2	-0.125	340100000	11
2	2.25	340100000	5
1	0.75	340100000	10
2	0.375	340100000	12
1	0	340100000	14
2	-0.625	340100000	14
1		340100000	7
1	0.25	340100000	8
1	-0.25	340100000	8
2	-1	340100000	14
1	0.25	340100000	6
2	-2.375	340100000	10
1	2.125	340100000	11
2	-2.125	340100000	14
1	-1.125	340100000	10
1	0.625	340100000	10
1	-2.25	340100000	12
2	1	340100000	10
2	-0.5	340100000	9
1	-0.25	340100000	13
2	0.25	340100000	10
1	0.375	340100000	8
2	1	340100000	10
1	1.25	340100000	5
1	-0.375	340100000	10
1	1.25	340100000	10
1	-0.75	340100000	14
2	1	340100000	8
2	0.375	340100000	9
2	0	340100000	8
2	0.375	340100000	8
1	1.125	340100000	7
1	-1.25	340100000	12
1	0.375	340100000	7
2	0.625	340100000	10
2	-4.375	340100000	13
2	1.875	340100000	7
2	0.375	340100000	9
2	-1.875	340100000	11
1	0	340100000	10
2	-0.25	340100000	5
2	-1.875	340100000	11
1	-2.125	340100000	14
1	1	340100000	9
2	-4	340100000	15
1	1.5	340100000	11
1	1	340100000	7
2	0.875	340100000	10
2	0.5	340100000	7
2	0.375	340100000	7
1	1.125	340100000	9
2	-0.125	340100000	13
1	-0.625	340100000	13
2	-3.375	340100000	15
1	1.625	340100000	10
1	0	340100000	6
2	0	340100000	11
2	0.375	340100000	12
1	0.125	340100000	14
1	1.625	340100000	7
2	0.375	340100000	13
2	0.5	340100000	13
1	1	340100000	9
1	-0.5	340100000	10
1	0.25	340100000	8
1	-5	340100000	14
2	1.75	340100000	5
1	0.75	340100000	15
1	-0.75	340100000	15
1	2.25	340100000	5
1	1.375	340100000	7
2	0.75	340100000	11
1	0.625	340100000	11
2	0.875	340100000	14
1	0.5	340100000	12
1	1.375	340100000	14
1	1.25	340100000	7
2	0.625	340100000	10
2	0.625	340100000	8
1	1	340100000	10
1	1	340100000	11
2	0.5	340100000	14
1	-0.125	340100000	9
1	1.5	340100000	5
1	-0.125	340100000	12
1	0.125	340100000	10
1	0	340100000	12
2	1.625	340100000	9
1	-1.125	340100000	14
1	0	340100000	10
2	-5.25	340100000	14
1	-0.875	340100000	13
2	-0.5	340100000	7
2	-0.875	340100000	10
1	-0.875	340100000	10
2	0.875	340100000	7
2	-1.125	340100000	14
2	1.25	340100000	7
2	-5	340100000	14
2	0.125	340100000	14
1	-4.125	340100000	13
1	1	340100000	7
1	0.125	340100000	8
1	-0.125	340100000	13
2	0.375	340100000	5
1	-1.125	340100000	15
2	-2	340100000	11
1	0.5	340100000	10
1	0.25	340100000	15
1	1.125	340100000	7
1	2.5	340100000	6
2	-1.125	340100000	12
2	5.875	340100000	9
2	-1.125	340100000	14
1	0.75	340100000	7
1	-0.625	340100000	10
2	-1.125	340100000	14
2	-0.875	340100000	6
1	-1	340100000	15
1	-0.875	340100000	10
1	0.75	340100000	6
1	0.875	340100000	7
2	0.875	340100000	9
2	-1.75	340100000	14
1	-0.375	340100000	11
1	0.625	340100000	6
2	0.375	340100000	8
2	0.375	340100000	13
2	1.25	340100000	10
2	0.25	340100000	8
1	1.25	340100000	7
1	1.875	340100000	10
1	-0.375	340100000	11
1	-0.375	340100000	9
1	0.625	340100000	5
2	-0.875	340100000	15
2	-1.125	340100000	14
2	-4.375	340100000	10
1	-0.125	340100000	10
1	1.625	340100000	5
2	0.875	340100000	7
1	2.875	340100000	12
1	0.25	340100000	15
1	-2.875	340100000	15
2	-1.125	340100000	12
1	-0.25	340100000	13
2	-5.5	340100000	15
1	-0.5	340100000	5
2	1.125	340100000	5
1	-1.875	340100000	15
1	0.875	340100000	12
1	-3.75	340100000	15
1	0.625	340100000	5
2	-6.625	340100000	14
1	1.75	340100000	6
2	1.5	340100000	7
2	1.625	340100000	6
1	0.375	340100000	8
2	0.375	340100000	15
1	0	340100000	11
1	1	340100000	6
2	-0.375	340100000	8
2	-1.875	340100000	10
1	1.125	340100000	5
2	0.5	340100000	13
2	-0.125	340100000	13
2	0.375	340100000	14
2	-5.125	340100000	12
1	0.125	340100000	6
1	-0.375	340100000	14
2	-1.25	340100000	9
2	0.375	340100000	14
2	0.75	340100000	9
2	1.5	340100000	6
1	-0.375	340100000	9
2	-3.625	340100000	11
2	0.125	340100000	15
2	0.75	340100000	11
1	-0.125	340100000	12
1	0.375	340100000	9
1	0.625	340100000	15
2	0.625	340100000	8
2	1.125	340100000	7
1	-2.625	340100000	14
2	-1.25	340100000	15
2	0.375	340100000	8
2	0.625	340100000	13
2	0.5	340100000	12
1	1.125	340100000	12
2	-3	340100000	13
2	0.875	340100000	10
2	0.5	340100000	5
2	-1.125	340100000	14
1	0.125	340100000	8
2	0.125	340100000	10
2	-2.125	340100000	15
2	5.75	340100000	10
2	0.875	340100000	13
1	0.625	340100000	7
1	-0.375	340100000	12
2	1.375	340100000	6
2	-0.25	340100000	15
2	0.875	340100000	9
2		340100000	5
1	0.625	340100000	9
2	-0.25	340100000	8
1	1.125	340100000	6
2	0	340100000	6
1	-2.375	340100000	13
2	-2.125	340100000	13
1	0.5	340100000	6
1	1.625	340100000	14
1	0.125	340100000	14
1	0.625	340100000	13
2	1.25	340100000	8
1	-0.75	340100000	7
1	-4.125	340100000	15
2	1.125	340100000	6
1	-1.625	340100000	14
1	0	340100000	14
1	0.5	340100000	7
1	-1.5	340100000	14
2	-2.5	340100000	11
2	0.375	340100000	9
1	0.25	340100000	10
2	-0.25	340100000	11
1	-3.375	340100000	10
2	-0.875	340100000	13
1	-0.5	340100000	14
1	-0.125	340100000	11
1	-3.5	340100000	15
1	-0.125	340100000	11
1	0.5	340100000	9
1	0.5	340100000	7
2	1.75	340100000	5
2	-0.125	340100000	6
1	0.125	340100000	13
1	1	340100000	10
2	-1.5	340100000	9
2	-3.75	340100000	13
1	1.125	340100000	7
1	-1.25	340100000	13
1	-3	340100000	13
1	1.75	340100000	5
1	0.875	340100000	5
1	-2.125	340100000	15
2	1	340100000	7
1	-3.25	340100000	14
2	1.875	340100000	5
2	-0.125	340100000	13
2	-4.25	340100000	11
2	1	340100000	10
2	0.75	340100000	9
2	-0.125	340100000	13
2	-0.5	340100000	11
1	1.375	340100000	5
2	-2.875	340100000	9
2	-2.625	340100000	14
1	-0.875	340100000	9
1	0.5	340100000	14
1	0.25	340100000	15
2	0	340100000	9
2	0.5	340100000	8
1	-2.5	340100000	9
1	1	340100000	9
1	0.25	340100000	10
2	-1.375	340100000	8
2	-2.25	340100000	15
1	1.25	340100000	8
2	0.375	340100000	13
1	2.25	340100000	9
2	1.875	340100000	5
2	0.875	340100000	5
1	-3	340100000	12
2	-2.25	340100000	14
2	2.125	340100000	6
2	-2	340100000	9
1	0.125	340100000	12
2	0.875	340100000	10
1	0.5	340100000	12
1	0.625	340100000	11
2	0.875	340100000	8
1	0.625	340100000	9
1	-3.5	340100000	12
2	0.375	340100000	7
2	-0.125	340100000	15
1	0.75	340100000	12
2	-0.875	340100000	15
1	0.875	340100000	8
2	1.25	340100000	9
1	1.25	340100000	11
1	0.125	340100000	10
2	-0.875	340100000	13
2	0.625	340100000	8
2	0.375	340100000	9
1	-4.625	340100000	14
2	-2.75	340100000	6
1	0.25	340100000	10
2	1.25	340100000	5
1	0.125	340100000	11
2	0.375	340100000	9
1	1	340100000	12
2	-3	340100000	15
2	-1.5	340100000	11
1	-0.5	340100000	14
1	0.875	340100000	6
1	0.5	340100000	11
1	1.125	340100000	7
1	-1.875	340100000	13
2	-1.125	340100000	10
2	-4.25	340100000	14
1	0.125	340100000	13
2	-1.875	340100000	12
2	0.625	340100000	11
2	-3.625	340100000	13
1	0.875	340100000	15
1	-2.75	340100000	12
1	-6.75	340100000	14
1	1.375	340100000	6
1	-1	340100000	14
2	-1.75	340100000	11
2	1.125	340100000	7
2	0.5	340100000	9
2	0.125	340100000	12
1	0.125	340100000	14
2	0.25	340100000	9
1	3.5	340100000	6
2	-4.625	340100000	15
2	-1.875	340100000	14
1	-1.5	340100000	13
1	0.625	340100000	8
1	-0.625	340100000	9
1	1	340100000	5
1	-0.625	340100000	12
1	0.125	340100000	14
2	-7	340100000	14
2	0.875	340100000	11
2	-2.5	340100000	14
2	2.125	340100000	6
1	-3.875	340100000	12
2	-2.125	340100000	15
2	-0.375	340100000	12
1	0.375	340100000	14
2	-0.125	340100000	11
1	0.75	340100000	10
1	1.375	340100000	5
1	-4.375	340100000	13
2	0.5	340100000	9
1	-6.25	340100000	10
1	-0.25	340100000	8
1	1.5	340100000	8
1	-0.875	340100000	15
2	-0.875	340100000	13
1	1	340100000	7
1	0.75	340100000	7
1	0.875	340100000	12
2	-1.75	340100000	15
1	0.5	340100000	14
1	-1	340100000	9
1	1.25	340100000	8
1	0.625	340100000	11
1	-1.25	340100000	10
2	0.125	340100000	9
2	0.625	340100000	5
1	0.375	340100000	13
1	-3.875	340100000	15
1	1.125	340100000	10
1	-2.125	340100000	13
2	1.75	340100000	5
2	0.875	340100000	9
2	0.125	340100000	8
2	0.875	340100000	12
1	1	340100000	9
1	0	340100000	14
2	-1	340100000	12
1	0.5	340100000	9
1	-1.125	340100000	13
1	0	340100000	9
1	1.125	340100000	7
1	0.5	340100000	13
1	-3.625	340100000	9
1	-0.125	340100000	6
1	-3.125	340100000	14
2	1.875	340100000	8
2	0.375	340100000	6
2	0.5	340100000	11
2	-3	340100000	15
1	-3.125	340100000	10
1	0.375	340100000	5
1	1.5	340100000	10
2	1	340100000	9
1	-2.5	340100000	15
2	0.625	340100000	6
2	1.375	340100000	6
1	-0.5	340100000	9
1	-0.5	340100000	9
2	0.25	340100000	10
2	-0.5	340100000	10
2	-0.875	340100000	12
1	1.125	340100000	10
2	-1.875	340100000	11
1	2.125	340100000	5
1	-3.125	340100000	15
2	0	340100000	6
2	-1.625	340100000	13
1	0	340100000	10
1	1.125	340100000	13
2	0.25	340100000	10
1	-0.125	340100000	9
1	-1.375	340100000	11
2	-3.875	340100000	11
2	-0.625	340100000	10
2	-0.375	340100000	11
1	-1.75	340100000	12
2	-0.125	340100000	13
2	1.75	340100000	6
1	-0.375	340100000	10
2	-9.875	340100000	6
2	-4.125	340100000	15
2	0.5	340100000	8
2	-1.75	340100000	15
2	0.375	340100000	9
2	0.625	340100000	9
2	2	340100000	5
1	0.5	340100000	7
1	1.125	340100000	8
1	0.125	340100000	14
1	0.625	340100000	14
2	-0.625	340100000	12
1	0.75	340100000	5
1	0.5	340100000	5
1	0.625	340100000	10
1	1.125	340100000	11
1	-3.75	340100000	10
1	-4	340100000	13
1	0.75	340100000	7
2	-0.125	340100000	12
1	-3.75	340100000	12
2	-0.875	340100000	11
1	-2.125	340100000	14
2	-3.75	340100000	14
2	0.875	340100000	7
1	0.625	340100000	8
1	-2.625	340100000	11
1	-2.625	340100000	15
1	-4.5	340100000	14
2	0	340100000	10
1	0.875	340100000	10
2	0.25	340100000	8
2	-2	340100000	12
2	0.875	340100000	7
1	1.5	340100000	5
1	-4.375	510200000	12
1	1.125	510200000	9
2	0.5	510200000	9
2	0.125	510200000	10
1	1.25	510200000	6
2	0.625	510200000	12
1	0.625	510200000	5
1	-2.875	510200000	14
2	0.25	510200000	6
1	-2.625	510200000	15
1	3.875	510200000	13
1	0.375	510200000	9
1	-6.125	510200000	13
2	-0.25	510200000	9
1	-0.25	510200000	10
2	1.125	510200000	9
1	-0.75	510200000	10
1	2.125	510200000	5
1	-0.375	510200000	12
2	1	510200000	6
2	1.125	510200000	8
1	0.625	510200000	8
1	-0.5	510200000	15
1	0.375	510200000	10
1	0.375	510200000	12
1	0	510200000	13
2	1	510200000	10
1	-3.125	510200000	14
1	0.625	510200000	9
2	1.25	510200000	14
2	-5.125	510200000	14
1	0	510200000	7
2	-7.75	510200000	15
2	-1	510200000	8
1	0	510200000	13
2	0.75	510200000	8
1	0.25	510200000	14
1	-1	510200000	14
1	5.125	510200000	12
2	-2.375	510200000	11
1	-6.125	510200000	15
2	0.375	510200000	14
1	0.625	510200000	8
1	-1.25	510200000	13
2	-0.375	510200000	6
1	-2	510200000	14
1	-3.75	510200000	15
1	0.25	510200000	13
2	1.375	510200000	7
2	0.375	510200000	10
1	1.25	510200000	8
1	0.375	510200000	10
1	1.125	510200000	7
1	1.625	510200000	8
1	0.875	510200000	12
2	-0.5	510200000	13
1	0.625	510200000	8
2	1.25	510200000	11
2	-1.375	510200000	13
2	0.625	510200000	13
1	0.25	510200000	12
1	1.25	510200000	8
1	-0.625	510200000	14
1	0.125	510200000	11
2	0.375	510200000	12
1	0.125	510200000	12
2	1.75	510200000	5
2	-0.875	510200000	11
1	0.75	510200000	9
1	0.625	510200000	6
2	0.5	510200000	12
1	-1.75	510200000	15
2	2.125	510200000	5
1	-4.125	510200000	12
2	-1.375	510200000	14
2	-0.875	510200000	14
2	1.25	510200000	6
2	0.125	510200000	5
1	0.875	510200000	7
2	1.125	510200000	11
1	1.25	510200000	6
1	1	510200000	12
2	0.375	510200000	10
2	-0.875	510200000	14
2	0.75	510200000	13
2	0.375	510200000	14
2	1	510200000	9
2	-6.125	510200000	12
1	-2.75	510200000	7
1	0.875	510200000	6
2	-0.25	510200000	10
2	0.625	510200000	7
2	-0.25	510200000	14
2	-3.75	510200000	15
2	-2.5	510200000	14
1	-2	510200000	13
1	0.375	510200000	10
1	1.75	510200000	9
1	1.75	510200000	14
2	-0.75	510200000	13
2	-1.375	510200000	15
2	-3.125	510200000	12
1	0	510200000	9
2	-0.25	510200000	10
2	0.625	510200000	6
2	-1	510200000	10
2	-2.875	510200000	8
1	-1.875	510200000	14
1	0.5	510200000	6
2	0.5	510200000	11
2	-5.875	510200000	10
1	0.75	510200000	6
1	0.875	510200000	11
2	0.375	510200000	7
1	1	510200000	14
2	0.875	510200000	10
1	1.875	510200000	9
1	1.375	510200000	15
1	1.375	510200000	14
1	1.75	510200000	5
1	0.375	510200000	6
1	-2.5	510200000	14
2	1.375	510200000	8
1	-1.75	510200000	15
1	-0.125	510200000	14
1	0.875	510200000	13
2	1.625	510200000	9
2	-1.125	510200000	8
2	1.625	510200000	8
1	1.25	510200000	6
2	-5.875	510200000	12
1	-4.875	510200000	14
1	0.25	510200000	14
2	0.625	510200000	12
2	-0.125	510200000	10
1	1.125	510200000	9
2	-0.875	510200000	11
1	0.125	510200000	11
2	-1.75	510200000	11
1	2.375	510200000	8
2	-0.75	510200000	13
2	0.75	510200000	7
1	0.5	510200000	12
1	-0.875	510200000	13
2	0.375	510200000	11
2	1.75	510200000	8
1	-0.125	510200000	11
2	-1.25	510200000	14
2	0.25	510200000	13
2	-2.25	510200000	10
2	0.125	510200000	10
2	-3.75	510200000	12
1	0.5	510200000	7
2	0.625	510200000	8
1	0.625	510200000	12
2	0.25	510200000	11
1	1.25	510200000	6
1	-2.125	510200000	13
1	-0.375	510200000	10
1	-0.25	510200000	10
2	0.375	510200000	15
2	1.375	510200000	5
2	-0.25	510200000	12
2	2.625	510200000	10
1	-2.625	510200000	14
2	0	510200000	12
2	-1.375	510200000	11
2	0	510200000	6
2	0.5	510200000	11
1	0.5	510200000	14
2	-2.875	510200000	13
1	-2.375	510200000	14
1	0.5	510200000	11
2	-0.125	510200000	12
2	-3.125	510200000	12
2	-3.5	510200000	14
1	-2.625	510200000	9
2	-3.25	510200000	15
1	-1	510200000	12
1	0	510200000	6
2	1.125	510200000	14
2	0.375	510200000	13
1	1.625	510200000	11
2	-3.75	510200000	15
2	0.75	510200000	7
2	-2	510200000	14
2	-0.125	510200000	10
1	0.5	510200000	10
1	0.25	510200000	15
2	0.625	510200000	13
2	-0.75	570200000	13
2	0	570200000	12
1	-1.5	570200000	15
1	-0.75	570200000	12
1	0.75	570200000	8
1	1.625	570200000	6
2	0.25	570200000	12
1	-0.625	570200000	9
2	0.5	570200000	10
2	-1	570200000	14
2	-5	570200000	10
2	-1.375	570200000	14
2	0.25	570200000	9
2	-0.125	570200000	11
2	0.125	570200000	7
2	0.875	570200000	6
1	-0.375	570200000	12
2	1.375	570200000	5
1	-3.375	570200000	14
1	0.625	570200000	12
2	-0.5	570200000	12
1	0.125	570200000	6
1	0.25	570200000	8
2	-0.5	570200000	13
2	-1.75	570200000	13
1	1	570200000	13
1	1.25	570200000	11
2	0.5	570200000	11
2	0.125	570200000	11
2	0.625	570200000	6
2	-2.5	570200000	13
2	0.375	570200000	5
2	0.375	570200000	8
2	0.875	570200000	15
2	0.625	570200000	12
1	1	570200000	13
2	0.25	570200000	13
1	1	570200000	7
2	2.625	570200000	9
1	0.375	570200000	9
1	-0.625	570200000	13
1	0.625	570200000	12
2	-1.375	570200000	13
2	0.75	570200000	8
1	1.25	570200000	8
1	0.75	570200000	8
2	1.875	570200000	5
1	0.5	570200000	9
2	1.375	570200000	11
2	-0.875	570200000	12
1	-1.125	570200000	13
2	-0.375	570200000	10
2	-0.375	570200000	14
2	-0.625	570200000	8
2	1.125	570200000	5
1	0.75	570200000	14
1	-1.125	570200000	13
1	-1.125	570200000	11
2	0.875	570200000	11
2	0.375	570200000	14
2	-1.125	570200000	8
2	-1.25	570200000	13
2	-4.625	570200000	11
1	-0.125	570200000	13
2	1.5	570200000	10
2	0.75	570200000	8
1	-2.5	570200000	9
1	1.5	570200000	6
2	0.125	570200000	13
2	-2.375	570200000	15
1	-0.875	570200000	13
1	0.875	570200000	9
2	-1.25	570200000	12
2	-2.5	570200000	14
2	0.375	570200000	12
1	-3.375	570200000	12
1	-0.5	570200000	14
2	-0.625	570200000	14
1	0.75	570200000	5
1	0.5	570200000	7
2	1.25	570200000	12
1	0.25	570200000	13
1	0.75	570200000	11
1	0.875	570200000	9
1	1.75	570200000	13
1	-1.25	570200000	12
2	-2.125	570200000	10
1	0.75	570200000	12
1	1.125	570200000	8
1	0.75	570200000	11
1	2	570200000	5
1	0.125	570200000	10
1	2.125	570200000	8
2	-0.5	570200000	6
1	0.25	570200000	9
1	0.75	570200000	10
2	-0.25	570200000	9
2	-2.375	710200000	15
2	4.875	710200000	12
1	-0.125	710200000	15
1	1.75	710200000	5
2	1.25	710200000	8
2	-0.5	710200000	10
1	0.125	710200000	12
2	2.375	710200000	9
2	1.375	710200000	5
1	0.125	710200000	13
2	0.75	710200000	8
1	0.625	710200000	10
1	1.25	710200000	8
1	-0.25	710200000	8
2	-0.625	710200000	14
2	0.125	710200000	14
2	-1.625	710200000	12
2	0.25	710200000	5
1	1.125	710200000	5
1	0.375	710200000	13
2	0.375	710200000	10
2	0.875	710200000	12
2	0	710200000	14
1	0.125	710200000	15
1	-1.375	710200000	14
1	-4.125	710200000	13
2	1.125	710200000	8
1	1.5	710200000	13
1	-0.25	710200000	8
1	0.125	710200000	14
2	0.5	710200000	11
1	0.25	710200000	14
2	-4.625	710200000	11
2	-0.75	710200000	11
2	0.75	710200000	8
2	-1.25	710200000	9
1	0.5	710200000	9
1	0.75	710200000	14
2	-0.875	710200000	8
1	-2	710200000	13
2	0.375	710200000	8
2	-0.75	710200000	13
1	-3.875	710200000	14
2	1.375	710200000	7
1	-1.375	710200000	9
2	-2.25	710200000	14
1	-0.25	710200000	14
1	-0.75	710200000	11
1	-0.5	710200000	10
2	1.625	710200000	5
1	2.375	710200000	13
2	-1.5	710200000	6
1	2.25	710200000	5
1	-3.375	710200000	8
1	1.125	710200000	6
2	-3.5	710200000	11
2	-2.125	710200000	14
2	-2.375	710200000	14
2	-4	710200000	14
1	0.875	710200000	7
2	0.25	710200000	10
1	1.25	710200000	12
1	0.875	710200000	7
1	-11.625	710200000	14
1	-1.375	710200000	14
1	-6.625	710200000	15
1	0	710200000	13
1	-2.875	710200000	13
2	-1.125	710200000	14
2	0.875	710200000	10
1	0.75	710200000	9
2	0.875	710200000	8
2	0	710200000	8
2	-1.875	710200000	15
1	0.875	710200000	11
1	-1.125	710200000	9
1	0.375	710200000	11
1	0.125	710200000	11
1	-0.5	710200000	10
1	0.125	710200000	9
1	-0.375	710200000	10
2	-5.125	710200000	14
2	-3.125	710200000	15
1	-5.625	710200000	12
1	0.875	710200000	9
1	-1.375	710200000	14
2	0.875	710200000	9
2	0	710200000	13
1	1.625	710200000	6
2	-0.375	710200000	13
2	0.5	710200000	9
2	1	710200000	8
2	0.25	710200000	14
2	0.5	710200000	13
2	-1.125	710200000	13
2	1	710200000	9
2	0.5	710200000	10
1	0	710200000	5
1	0	710200000	9
2	-1.25	710200000	13
2	-1.75	710200000	14
2	-1.75	710200000	15
2	1.125	710200000	9
2	0.25	710200000	11
2	-1.625	710200000	14
1	-1.125	710200000	12
2	-0.375	710200000	10
2	-1.125	710200000	12
2	-2.875	710200000	14
1	-1.375	710200000	9
1	0.5	710200000	7
1	0.75	710200000	7
1	0.5	710200000	9
1	-4	710200000	13
2	1.375	710200000	5
1	-1.125	710200000	13
2	-3.25	710200000	10
1	0.25	710200000	14
1	0.5	710200000	9
2	1.5	710200000	5
1	0.25	710200000	14
1	-0.75	710200000	6
1	-2.75	710200000	14
1	-1.875	710200000	14
1	-0.875	710200000	9
2	0.75	710200000	13
1	1.5	710200000	9
2	1.125	710200000	14
2	1	710200000	7
1	0.375	710200000	6
1	0.125	710200000	8
1	0.625	710200000	9
2	-0.125	710200000	11
1	0.5	710200000	8
1	0.75	730200000	5
2	-4.625	730200000	13
1	0.75	730200000	6
1	0	730200000	10
2	1.25	730200000	8
2	1.25	730200000	10
2	1	730200000	7
1	0.75	730200000	13
2	-0.375	730200000	14
1	-0.25	730200000	6
2	0.25	730200000	6
1	0.75	730200000	11
1	0.875	730200000	10
2	0.875	730200000	6
1	0.375	730200000	12
2	1.75	730200000	7
1	-0.125	730200000	7
2	1.5	730200000	8
1	1.25	730200000	6
1	1	730200000	6
1	-1.5	730200000	5
1	0.875	730200000	6
1	1.25	730200000	10
2	-0.125	730200000	10
1	0.125	730200000	12
2	0.625	730200000	8
1	1.75	730200000	5
2	-2.5	730200000	13
2	-1.375	730200000	14
1	-0.625	730200000	15
2	1.75	730200000	8
1	-1	730200000	14
1	0.25	730200000	11
2	-0.875	730200000	15
2	-0.5	730200000	14
2	5.25	730200000	12
2	1.125	730200000	11
2	1.125	730200000	8
2	4.25	730200000	5
1	0.625	730200000	8
2	0.625	730200000	5
2	1	730200000	7
1	1.25	730200000	12
2	0	730200000	6
1	-2.125	730200000	14
2	3.25	730200000	5
1	0	730200000	10
2	-1.625	730200000	11
1	5.875	730200000	12
2	-0.5	730200000	9
2	0.875	730200000	7
2	-4.375	730200000	13
1	-0.875	730200000	14
1	1.125	730200000	5
2	1.125	730200000	7
2	-0.125	730200000	6
2	1.125	730200000	9
1	0.375	730200000	13
2	0.75	730200000	10
1	1.125	730200000	6
2	-1	730200000	15
2	-3.25	730200000	14
2	-1	730200000	13
2	0.75	730200000	6
1	0.5	730200000	10
1	-1.375	730200000	11
2	-0.875	730200000	12
2	0.625	730200000	14
1	-1.875	730200000	15
1	1.5	730200000	5
1	0.625	730200000	9
1	0.875	730200000	15
1	-1.375	730200000	12
1	-3.125	730200000	13
1	0.125	730200000	8
1	0.125	730200000	12
2	0.25	730200000	6
1	-1.5	730200000	11
2	-1.375	730200000	14
1	0.875	730200000	14
2	0.75	730200000	6
1	-0.375	730200000	10
1	0.375	730200000	5
1	0.25	730200000	9
1	-7.25	730200000	10
2	-1.125	730200000	12
2	1	730200000	6
2	0.25	730200000	15
1	0.25	730200000	11
1	0.125	730200000	14
2	-1.125	730200000	15
2	-3	730200000	10
2	-0.875	730200000	11
1	0.5	730200000	5
2	-2.5	730200000	14
1	0.5	730200000	14
1	0.75	730200000	6
1	0.375	730200000	9
2	1.5	730200000	6
1	0.5	730200000	12
2	-0.75	730200000	13
1	1.5	730200000	10
2	-0.125	730200000	15
1	0.625	730200000	11
1	-4.25	730200000	14
1	0.125	730200000	9
1	1.25	730200000	11
2	0.75	730200000	12
1	0	730200000	13
1	0.75	730200000	10
2	-0.25	730200000	15
2	-5.125	730200000	14
1	-0.75	730200000	15
2	0.5	730200000	7
1	-0.25	730200000	15
2	1	730200000	6
2	0.5	730200000	14
1	0.375	730200000	8
1	1.125	730200000	8
2	-1.5	730200000	12
2	1.125	730200000	8
2	0.875	730200000	8
2	2.25	730200000	8
1	1	730200000	12
1	-3	730200000	14
2	0.875	730200000	7
2	-0.375	730200000	14
2	0.125	730200000	8
2	-1.375	730200000	13
1	-1.875	730200000	9
1	-1.125	730200000	14
1	0.375	730200000	6
1	-0.75	730200000	15
2	0.875	730200000	14
1	-3.25	730200000	9
2	-3.875	730200000	13
1	0.625	730200000	10
2	0.625	730200000	8
2	-2.25	730200000	11
2	0.375	730200000	11
2	-0.75	730200000	7
2	-0.625	730200000	12
2	1.75	730200000	9
1	0.875	730200000	6
2	-0.125	730200000	13
1	0.25	730200000	7
2	0.875	730200000	12
1	-0.875	730200000	14
1	-2.25	730200000	11
1	-0.375	730200000	7
1	0.25	730200000	11
1	0.875	730200000	12
2	0.25	730200000	13
2	2.25	730200000	9
2	0.625	730200000	8
1	0.5	730200000	6
2	0.375	730200000	14
1	0.875	730200000	9
1	1	730200000	10
2	0.875	730200000	10
2	-4.375	730200000	15
1	-0.25	730200000	13
2	-1.75	730200000	12
1	0.875	730200000	12
1	-1.875	730200000	13
1	-5.25	730200000	15
1	0.125	730200000	7
2	0.75	730200000	8
1	0.625	730200000	14
1	-2.875	730200000	11
2	1.625	730200000	7
2	1.125	730200000	8
2	0.625	860000000	8
2	1.25	860000000	6
1	-0.125	860000000	9
1	-3.5	860000000	15
2	1.875	860000000	8
2	-0.125	860000000	15
1	0.75	860000000	14
2	-2.75	860000000	11
2	1.25	860000000	10
1	0.375	860000000	10
2	1.25	860000000	11
1	1.5	860000000	5
1	0	860000000	5
2	0.875	860000000	7
1	0.5	860000000	12
1	1.25	860000000	7
2	0.375	860000000	8
1	0.75	860000000	9
1	-3.5	860000000	14
1	1.375	860000000	8
2	0.625	860000000	6
1	0.25	860000000	9
1	-3.375	860000000	14
1	-0.25	860000000	6
2	0.625	860000000	12
1	-4.75	860000000	14
2	0.625	860000000	10
2	0.75	860000000	5
2	1.375	860000000	5
1	-1.25	860000000	9
1	0.375	860000000	11
2	2.125	860000000	9
2	-0.875	860000000	9
2	-4.375	860000000	14
2	-2.625	860000000	14
1	-4	860000000	12
1	-8.75	860000000	13
1	0.125	860000000	9
1	0	860000000	12
2	0.75	860000000	10
2	-0.75	860000000	12
2	0.875	860000000	6
1	0	860000000	13
1	0	860000000	15
1	0.125	860000000	11
2	0.625	860000000	11
2	0.875	860000000	11
2	-0.625	860000000	9
1	-2.625	860000000	15
1	1.875	860000000	5
2	-1.125	860000000	14
2	0	860000000	10
1	0.75	860000000	5
2	-0.5	860000000	12
2	-0.5	860000000	14
1	1.25	860000000	13
1	0	860000000	13
2	0.625	860000000	13
2	-1.375	860000000	15
1	-5	860000000	13
1	2.375	860000000	5
2	-1.5	860000000	9
2	0.625	860000000	9
2	-0.5	860000000	15
1	-1.25	860000000	13
2	-3.25	860000000	15
1	0.625	860000000	10
1	-2.375	860000000	15
1	0.625	860000000	15
2	-0.25	860000000	12
2	0.75	860000000	8
2	0.25	860000000	11
2	-2.75	860000000	12
1	-1.625	860000000	14
2	-3.375	860000000	14
1	-2.25	860000000	10
2	1.125	860000000	9
1	-0.25	860000000	6
2	1.625	860000000	5
1	-1.5	860000000	11
2	1.875	860000000	8
1	-0.375	860000000	11
1	1.125	860000000	9
2	-1.375	860000000	10
1	1	860000000	8
2	0.375	860000000	8
2	1.375	860000000	5
2	-4.375	860000000	14
2	-1.125	860000000	11
1	-2.25	860000000	15
2	0.875	860000000	7
2	2.25	860000000	9
1	0.5	860000000	8
1	0.75	860000000	14
2	-1.125	860000000	11
2	0.75	860000000	6
2	1.375	860000000	6
1	1.125	860000000	5
2	1.25	860000000	5
2	-0.125	860000000	6
2	1.125	860000000	7
1	-0.625	1040000000	12
1	-0.125	1040000000	12
1	-3.375	1040000000	11
2	-2.125	1040000000	12
2	-0.5	1040000000	12
1	1	1040000000	8
1	0.5	1040000000	13
2	-2.125	1040000000	11
2	-2.625	1040000000	15
2		1040000000	9
2	0.75	1040000000	8
2	-3.25	1040000000	14
1	0.375	1040000000	8
2	-3.375	1040000000	14
2	0.625	1040000000	10
1	-1.375	1040000000	11
2	-1	1040000000	13
1	-0.125	1040000000	10
1	-1.25	1040000000	12
2	1.125	1040000000	7
1	-7.125	1040000000	13
2	1.5	1040000000	7
2	0.625	1040000000	12
2	-1.375	1040000000	11
2	-2.5	1040000000	13
1	-1.125	1040000000	12
1	-1.625	1040000000	14
1	-0.5	1040000000	9
1	0.75	1040000000	6
2		1040000000	8
1	-3.125	1040000000	13
2		1040000000	13
2	-1.125	1040000000	11
2	0.375	1040000000	9
1		1040000000	5
1	-0.25	1040000000	15
1	0.875	1040000000	11
2	-2.75	1040000000	10
2	0.125	1040000000	12
1	-4.125	1040000000	15
2	-0.25	1040000000	11
1	-2.375	1040000000	14
2	-0.5	1040000000	12
1		1040000000	5
1	-1.125	1040000000	14
2	-1.375	1040000000	13
2	0.375	1040000000	8
1	-0.75	1040000000	15
1	0.375	1040000000	9
1	0.125	1040000000	7
2	-1.375	1040000000	14
2	-11	1040000000	11
2	0.375	1040000000	8
2	0.125	1040000000	13
1	0.5	1040000000	7
1	0.25	1040000000	8
1	-1.625	1040000000	15
2	1	1040000000	7
2	-0.5	1040000000	13
2	0.25	1040000000	13
2	2.875	1040000000	6
1	0.625	1040000000	8
2	2.25	1040000000	5
1	-0.125	1040000000	8
1	-5.625	1040000000	14
2	0.75	1040000000	12
1	0.125	1040000000	13
2	-0.625	1040000000	11
1	-2	1040000000	15
1	-0.5	1040000000	10
1	0.25	1040000000	6
1	0.625	1040000000	12
2	0.625	1040000000	11
1		1040000000	5
1	2.75	1040000000	11
1	0.875	1040000000	11
2	0.75	1040000000	8
1	-3.875	1040000000	14
2	0.75	1040000000	5
2	-2	1040000000	15
1	-0.625	1040000000	9
1	-0.125	1040000000	10
1	2.375	1040000000	5
2	0.125	1040000000	8
1	1.25	1040000000	5
2	0.5	1040000000	8
1	-5.625	1040000000	13
2	0.25	1040000000	10
1	1	1040000000	8
1	0.75	1040000000	7
2	-1.375	1040000000	12
1	0.125	1040000000	14
2	1.5	1040000000	9
2	-0.625	1040000000	11
1	-0.125	1040000000	10
2	-0.375	1040000000	13
1	-0.875	1040000000	12
2	-1.875	1040000000	14
1	-0.125	1040000000	10
1	0.625	1040000000	9
1	0.875	1040000000	15
2	-0.375	1040000000	12
2	0.375	1040000000	11
2	1.875	1040000000	9
1	1.125	1040000000	10
1	-0.5	1040000000	14
1	1	1040000000	8
1		1040000000	6
1	1.125	1040000000	8
2	0.625	1040000000	10
1	0.125	1040000000	12
1	0	1040000000	11
2	0.125	1040000000	14
1	-6.5	1040000000	10
1	-2.25	1040000000	14
1	1	1040000000	6
1	-1.125	1040000000	14
2	0.375	1040000000	10
1	0	1040000000	7
2	0.125	1040000000	15
1	0.875	1040000000	7
2	1.25	1040000000	6
1	-4.625	1040000000	15
1	-0.875	1040000000	14
2	-0.5	1040000000	11
1	-6.625	1040000000	15
2	0.875	1040000000	7
2	-3.125	1040000000	14
2	-3.375	1040000000	10
1	-2.875	1040000000	13
2	-0.5	1040000000	14
1	0.25	1040000000	13
1	0.125	1040000000	8
1	0.5	1040000000	10
1	0.25	1040000000	14
2	1.375	1040000000	8
1	0	1040000000	9
2	0.125	1040000000	14
2	0.625	1040000000	7
2	-0.125	1040000000	10
1		1040000000	15
2	0.625	1040000000	10
1	-0.125	1040000000	13
1	0	1040000000	6
1	0.25	1180000000	9
1	-0.875	1180000000	12
1	-0.625	1180000000	9
1	0.5	1180000000	8
2	-0.625	1180000000	10
2	0.625	1180000000	9
1	1	1180000000	14
2	-2.125	1180000000	12
2	0.5	1180000000	5
2	0	1180000000	5
1	-5.375	1180000000	15
2	0.5	1180000000	7
1	0.25	1180000000	6
1	-2.375	1180000000	13
1	-1.5	1180000000	12
2	0.375	1180000000	9
1	-0.75	1180000000	15
1	-0.25	1180000000	15
1	0.125	1180000000	8
2	-3.5	1180000000	13
1	-3.125	1180000000	15
2	1.625	1180000000	5
1	-2.75	1180000000	15
1	0.25	1180000000	11
1	-0.125	1180000000	15
1	0.5	1180000000	8
1	-1.25	1180000000	10
2	0.75	1180000000	10
2	-0.375	1180000000	15
2	2	1180000000	5
1	0.5	1180000000	9
2	0.75	1180000000	6
2	-2.25	1180000000	15
2	0.75	1180000000	12
2	0.25	1180000000	10
2	-1.5	1180000000	12
1	0.625	1180000000	13
2	-0.25	1180000000	13
1	-0.25	1180000000	13
1	1.375	1180000000	6
2	1.125	1180000000	9
1	0.625	1180000000	15
1	-1.375	1180000000	14
1	-0.625	1180000000	10
1	-0.5	1180000000	14
2	0.375	1180000000	11
1	1	1180000000	8
1	0.25	1180000000	12
1	-1.75	1180000000	15
1	-0.125	1180000000	12
1	0.625	1180000000	11
2	-3.125	1180000000	13
1	0.75	1180000000	9
2	0.875	1180000000	7
1	0.375	1180000000	14
2	0.375	1180000000	6
1		1180000000	6
2	-2	1180000000	11
1	1.375	1180000000	9
1	1.375	1180000000	12
1	-0.625	1180000000	15
1	0.75	1180000000	12
1	-1	1180000000	15
1	-6.75	1180000000	7
1	-3.75	1180000000	11
1	-1.375	1180000000	15
1	-0.125	1180000000	7
2	-0.5	1180000000	8
1	1.75	1180000000	8
2	1.625	1180000000	8
2	2.125	1180000000	8
1	-0.125	1180000000	12
1	0.125	1180000000	14
1	-0.75	1180000000	15
1	-0.375	1180000000	15
1	0.125	1180000000	12
2	-4.375	1180000000	9
1	1.125	1180000000	8
1	0.375	1180000000	7
1	0.75	1180000000	5
2	1	1180000000	8
1	0.5	1180000000	9
2	-0.875	1180000000	14
2	-8	1180000000	15
1	0.875	1180000000	9
2	-3.625	1180000000	15
1	-0.75	1180000000	13
1	-2.5	1180000000	15
2	-4.625	1180000000	10
2	0.875	1180000000	9
2	-0.125	1180000000	14
1	1.625	1180000000	5
1	-1	1180000000	9
1	-0.5	1180000000	9
1	0.5	1180000000	12
1	0.125	1180000000	14
2	-1	1180000000	11
2	0.75	1180000000	10
1	-0.125	1180000000	13
1	-0.625	1180000000	10
2	-0.625	1180000000	15
1	0.375	1180000000	10
2	0.625	1180000000	12
1	-1.625	1180000000	13
2	-2	1180000000	14
2	-1	1180000000	13
2	-0.75	1180000000	7
1	-0.5	1180000000	12
1	-2.875	1180000000	12
1	0.875	1180000000	5
1	-1.125	1180000000	15
1	0.25	1180000000	14
1	-0.75	1180000000	11
2	0.5	1180000000	9
2	1	1180000000	8
2	-4.75	1180000000	14
2	0.125	1180000000	8
1	-0.25	1180000000	14
2	0.25	1180000000	11
2	-11	1180000000	14
1	-2.25	1180000000	12
2	1.125	1180000000	11
1	-11.375	1180000000	14
2	0.125	1180000000	11
2	-2.625	1180000000	13
2	-4.375	1180000000	12
1	1.25	1180000000	11
2	-0.25	1180000000	11
1	-1.5	1180000000	12
1	-3.125	1180000000	12
1	-3	1180000000	14
1	-0.625	1180000000	10
1	-0.375	1180000000	15
2	-0.125	1180000000	5
2	-1.375	1180000000	11
1	-0.125	1180000000	14
2	-0.125	1180000000	8
1	1	1180000000	9
2	0.125	1180000000	9
2	-0.125	1180000000	6
2	-4.25	1180000000	9
2	-1.125	1180000000	12
1	-1.625	1180000000	8
1	1.375	1180000000	13
1	-1	1180000000	14
2	-5	1180000000	13
2	0.375	1180000000	5
2	-7.125	1180000000	14
2	0.375	1180000000	6
1	-0.25	1180000000	12
2	2.5	1180000000	5
2	0.5	1180000000	10
1	0.125	1180000000	10
2	0.5	1180000000	12
2	1.125	1180000000	9
1	-0.375	1180000000	8
1	0.375	1180000000	11
2	1.5	1180000000	10
2	-2.625	1180000000	15
2	0	1180000000	12
2	-0.125	1180000000	8
2	-2.875	1180000000	15
1	-0.625	1180000000	14
1	-1.75	1180000000	14
1	3	1180000000	5
2	1.125	1180000000	9
1	-1.375	1180000000	14
1	0.5	1180000000	8
2	1.25	1180000000	7
2	-2.125	1180000000	14
1	0.75	1180000000	8
1	-1	1180000000	12
2	0.25	1180000000	8
2	0.25	1180000000	13
1	1	1180000000	5
[truncated: 2,219 more rows]
