# Supplementary material for: Identifying Children at Risk of High Myopia Using Population Centile Curves of Refraction
Source: PLoS One. 2016 Dec 28;11(12):e0167642. doi: 10.1371/journal.pone.0167642 (PMC5193395; doi:10.1371/journal.pone.0167642)
Supplement: S2 File — (XLSX) [file pone.0167642.s002.xlsx]

## Sheet: Sheet1
gender	seod_06	seod_07	seod_08	seod_09	seod_10	seod_11	seod_12	cen_3	cen_5	cen_10	cen_25	hmyo	age_6	age_7	age_8	age_9	age_10	age_11	age_12
1	-1	-1.125	-1.125	-1.125	-1.25			0	0	0	0	0	14.1766	15.2252	16.2053	17.1608	18.1903
1	0.75	0.125		-0.75				0	0	0	0	0	12.1999	13.1828		15.1732
2	-1.18	-1.875	-2.5	-3.125	-2.875	-3	-3	0	0	0	1	0	10.883	11.8823	12.8679	13.8727	14.9651	15.9261	16.8871
2	0.685	0.25	-0.375	-1	-1.25	-1.625	-2.625	0	0	0	0	0	10.8063	11.8467	12.7912	13.7769	14.8474	15.8275	16.8268
2	-1.62	-2.125	-3	-3.25	-3.75	-3.75	-4	0	0	0	1	0	12.6626	13.7112	14.6064	15.603	16.6571	17.6427	18.6201
1	-1.5	-2	-3.75	-3.5	-3.75			0	0	0	1	0	12.7967	13.7769	14.7734	15.7125	16.7283
1	2.065	2	2.125	2.25	2.125		2.5	0	0	0	0	0	12.0328	13.065	14.0205	15.0007	16.0794		18.1054
1	0.815	1	1.125	0.75	1		1.75	0	0	0	0	0	11.8604	12.8597	13.8453	14.8337	15.8713		17.922
2	0.625	0.625	0	0.5	-0.125			0	0	0	0	0	10.3217	11.3347	12.3094	13.3142	14.3573
2	-4.435	-4.875	-4.5	-4.75	-5	-5.125	-5.375	0	0	1	1	0	13.5332	14.5626	15.5017	16.4983	17.5825	18.5626	19.5318
2	0.94	0.75	0.875	0.375	0.25	0.375	-0.125	0	0	0	0	0	9.45654	10.4531	11.4333	12.4408	13.5195	14.4641	15.4579
2	0.19		-1.25	-2.5	-3	-3.5	-4.25	0	0	0	0	0	10.5845		12.6762	13.5962	14.6064	15.5893	16.6434
2	-0.625	-0.875	-1.25	-2	-3	-4.125		0	0	0	0	0	11.6058	12.5777	13.5962	14.5654	15.5619	16.6242
1	0.5	1.125	0.5	0.75	0.625	0.625		0	0	0	0	0	11.7262	12.7255	13.7221	14.7433	15.7563	16.8131
1	0.625	0.375	0.75	0.25	0.5	1	0.5	0	0	0	0	0	12.1834	13.1992	14.2341	15.1622	16.219	17.2293	18.1848
2			-3.25	-3	-2.75	-2.5	-2.75	0	0	0	1	0			15.4196	16.3833	17.3771	18.4093	19.4305
1	-3.125	-3.875	-4.5	-4.875	-5.125	-4.625		0	0	0	1	0	14.9952	15.9781	16.9966	17.9767	18.9651	19.9973
1	-3.25	-3.25	-3.75	-4	-4.75	-5.25	-5.5	0	0	0	1	0	13.0486	13.9904	14.9706	15.9535	17.0459	18.0069	18.9979
1	0.12	0	-0.25	-0.5	-1	-1		0	0	0	0	0	9.97673	10.976	11.9507	12.9528	13.9494	15.0691
1	0.375		-0.75	-1.5	-2	-2.25	-3	0	0	0	0	0	10.7543		12.794	13.7221	14.7543	15.7837	16.8022
1	1.25	0.875	0.25	0.875	0.75			0	0	0	0	0	11.1759	12.1013	13.0705	14.0753	15.1157
1	1.5	1.125	0.625	0.625	1	1.25	0.5	0	0	0	0	0	9.79877	10.7734	11.7344	12.6927	13.7468	14.8337	15.7563
1	-1.625	-2.375	-2.5	-2.75	-3	-3	-3.25	0	0	0	0	0	14.5243	15.5236	16.5311	17.4949	18.5544	19.5428	20.5394
2	-0.375	-1		-3	-3.5	-3.875		0	0	0	0	0	11.3265	12.3285		14.2368	15.258	16.3422
2	-2.56	-3.875	-5	-5.5	-5.5	-5.5	-5.875	0	0	0	1	0	12.7967	13.7851	14.7652	15.7563	16.7639	17.8179	18.7899
2	-0.5	-1	-1.5	-1.75	-2.25			0	0	0	0	0	12.95	14.0151	14.935	15.9398	16.9528
1	-0.625	-1.125	-1.375	-1.375	-1.125	-1.125	-1	0	0	0	0	0	12.2738	13.2786	14.2998	15.2772	16.3039	17.3443	18.3217
2	-4	-5	-5.625	-6	-6.5	-6.625	-6.75	0	0	0	1	0	14.0725	15.0719	16.0958	17.0705	18.0698	19.1102	20.104
1	0.815	0.75	0.375	-0.25	-0.125		-0.625	0	0	0	0	0	13.6345	14.6201	15.6797	16.6187	17.6537		19.6496
2	-2.875	-3.125	-3.5	-4.25	-4.25	-4.25	-4.5	0	0	1	1	0	11.9617	12.9637	13.9795	14.9432	15.9672	16.9829	17.9931
2	1.875	1.625	1.5	1	0.75	1	0.625	0	0	0	0	0	11.8001	12.8022	13.8097	14.7844	15.7919	16.8378	17.8207
2	0.25	-0.875	-1	-1	-0.625	-0.25	-0.25	0	0	0	0	0	10.6694	11.7344	12.679	13.6591	14.6804	15.7289	16.6708
2	-3.75	-5.25	-6.125	-7	-6.875	-6.875	-7	0	1	1	1	1	10.4914	11.5181	12.5092	13.5058	14.5599	15.5099	16.4956
2	0.44	-0.375	-0.375	-0.375	-0.375	-0.875	-1.125	0	0	0	0	0	10.1875	11.1431	12.2519	13.1362	14.1465	15.1677	16.167
2	0.0650001	-1.375	-3	-4.125	-3.875	-3.625	-3.375	0	0	0	0	0	13.2266	14.256	15.217	16.1725	17.2649	18.2669	19.2936
2	0	-0.25	-1	-1.5				0	0	0	0	0	13.8672	14.8747	15.8439	16.8378
2	0.375	0	-0.25	-0.75				0	0	0	0	0	13.5277	14.4695	15.4661	16.4545
2	0.625	0.625		0	0.25			0	0	0	0	0	12.2026	13.1964		15.2526	16.2683
1	1	0.5		-1.75	-2.375	-3	-3.375	0	0	0	0	0	11.7262	12.7529		14.7598	15.718	16.7146	17.6783
1	-1.68	-2.5	-3.25	-3	-3.125			0	0	0	0	0	14.8282	15.822	16.8487	17.9192	18.8665
2	-0.245	-0.375	-0.5	-0.875	-1	-1.125	-0.875	0	0	0	0	0	13.7878	14.8008	15.7947	16.7858	17.7933	18.8145	19.781
1	1.25	0.5	0	-0.5	-0.25	-0.625	-0.75	0	0	0	0	0	10.7269	11.6715	12.6708	13.6427	14.6804	15.6852	16.6981
1	-0.815	-2.125	-1.625	-1.75	-2.25	-1.875	-1.875	0	0	0	1	0	11.1513	12.1506	13.1499	14.1164	15.1431	16.1424	17.191
2	-2.745	-3.625	-4.25	-4.625	-5.125	-5	-5	0	1	1	1	0	10.1081	11.0965	12.1068	13.1992	14.0999	15.1212	16.1068
2	1.125	1.125	1.25	1.25				0	0	0	0	0	14.0972	15.1129	16.1068	17.1116
1	0.565	0.375	0.5	0.375	0.375	0.375		0	0	0	0	0	14.1848	15.1622	16.1916	17.1417	18.1465	19.2033
1	-0.185	-0.125	-0.5	-0.75				0	0	0	0	0	12.3012	13.347	14.3217	15.2745
1	-4.875		-6.25	-6	-6.25			0	1	1	1	1	13.9904		15.9699	16.8734	17.8919
1	-1.87	-2.5	-2.25	-2.375	-2.625	-2.5		0	0	0	1	0	12.5695	13.5578	14.5517	15.5127	16.6105	17.5715
1	-0.375	-0.625	-1	-1.5	-1.25			0	0	0	0	0	12.512	13.5359	14.5352	15.4579	16.5092
2	-2.18	-2.5	-2.25					0	0	0	1	0	13.2594	14.2368	15.2416
2	1.25	1.125	1		0.75	0.5	-0.25	0	0	0	0	0	9.4976	10.5134	11.4771		13.5113	14.5106	15.4661
2	2	1.625	1.25	1	1		0.5	0	0	0	0	0	9.22382	10.1766	11.1759	12.1478	13.1828		15.2142
2	-2.435	-2.875	-3.375	-3.25	-3.25			0	0	0	1	0	13.9767	14.9596	15.9617	16.9227	17.9767
1	-0.75	-1.25	-2	-2.625	-3	-3.25	-3.5	0	0	0	0	0	12.5065	13.5086	14.4558	15.4168	16.4244	17.4812	18.4805
1	0.5	0.375	0.125	-0.25	-0.25	0.125		0	0	0	0	0	13.1526	14.1437	15.1321	16.0712	17.1033	18.2067
1	0.75		0.5	0.5	0.5			0	0	0	0	0	13.8699		15.8193	16.8186	17.8234
2	-0.93	-0.875	-0.75	-0.75	-0.75			0	0	0	1	0	11.2799	12.2628	13.2704	14.2286	15.2444
1	0.37	0	-0.875	-1.875	-1.875	-1.875		0	0	0	0	0	11.8111	12.8788	13.8179	14.7515	15.8084	16.8871
1	0.5			-0.625	-0.75	-0.625	-1	0	0	0	0	0	9.79877			12.7146	13.8125	14.8036	15.7509
1	-1.25	-2.25	-3.5	-4	-5	-5	-5.125	0	0	0	1	0	11.2033	12.1561	13.1444	14.1164	15.1376	16.1561	17.1444
2	-1.18	-1.25	-1.625	-2.125	-1.75	-1		0	0	0	0	0	14.2834	15.269	16.3094	17.232	18.2478	19.2854
1	0.5	-0.125	-0.5	-1.125	-1.375	-2.125		0	0	0	0	0	10.5134	11.4387	12.449	13.5003	14.4641	15.4524
2	-0.555	0	-0.5	-0.5	-0.25	0.125		0	0	0	0	0	12.3094	13.3142	14.2669	15.2416	16.2875	17.3087
2			-3.125	-4	-4.125	-4.375	-5.125	0	0	1	1	0			13.1034	14.1793	15.1047	16.0958	17.0869
2	0.245	0.375	-0.25	-0.25	0	-0.25	-0.125	0	0	0	0	0	14.0068	15.0335	15.9836	16.9692	18.0424	18.9843	20.0301
2	-5.555	-6.25	-6.5	-6.5	-6.625	-6.75	-7	0	1	1	1	1	14.7543	15.7344	16.7392	17.6783	18.7871	19.7837	20.7912
2	0.745	0.875	0.5	0.375	0.375	0.625	0	0	0	0	0	0	11.5072	12.5476	13.525	14.486	15.54	16.575	17.5359
2	1	0.75	0.75	0.625	0.75		1	0	0	0	0	0	14.0288	14.9897	15.9945	17.0157	17.9931		20.0164
2	1	1	0.75	0.5	0.25			0	0	0	0	0	12.6845	13.6564	14.6365	15.5756	16.627
1	0.69	0.75	0	-0.5	-1.25	-1.75	-2.75	0	0	0	0	0	9.37988	10.3628	11.3566	12.3258	13.3224	14.3628	15.3758
2	0.69	0.625	0.625	0.625	0.875	1.125	1.25	0	0	0	0	0	13.1773	14.2012	15.1321	16.115	17.2594	18.2587	19.2498
2	1.125	1	0.5	0.375	0.5	0.375	0.625	0	0	0	0	0	9.94114	10.9459	11.8467	12.8652	13.8754	14.9131	15.9124
2	0.06	0	-0.125	0	-0.125	0.125	-0.5	0	0	0	0	0	10.4914	11.4825	12.4682	13.4428	14.4531	15.4908	16.4873
2	1.995	1.625	1.75	1.75	1.25	1.5	0.875	0	0	0	0	0	9.73306	10.7132	11.7071	12.7502	13.6892	14.7242	15.7125
2	-0.25	-0.375	-1	-1.875	-1.875			0	0	0	0	0	11.4086	12.3559	13.3415	14.308	15.3292
1	-1.87	-2.25	-2.5	-3.25	-3.75	-4.5	-4.25	0	0	0	0	0	13.5387	14.527	15.5127	16.5065	17.5003	18.538	19.5702
1	-0.62	-2.25	-2.75	-3.5	-3.625	-3.5	-3.625	0	0	0	0	0	12.4736	13.5113	14.4476	15.4114	16.4161	17.4483	18.4531
1	-1.25		-1.5		-2			0	0	0	0	0	13.6071		15.5537		17.5113
2	-0.81	-1.625	-2.125	-2.875	-3.75			0	0	0	0	0	12.5996	13.6153	14.6064	15.5674	16.6187
2	1	0.625	0.5	0	-0.75			0	0	0	0	0	13.0541	14.0123	14.9979	15.9452	17.0021
1	0.125	-1.5	-2.375	-3.25	-4	-5	-5	0	0	0	0	0	9.10883	10.1301	11.0828	12.0575	13.0678	14.0616	15.0746
1	-0.125	-0.5	-1.125	-1.5	-1.875	-1.75	-2	0	0	0	0	0	9.95482	10.9459	11.9206	12.909	13.9138	14.9514	15.9124
2	1	0.75	0.375	0.25	0.25	0.25	-0.5	0	0	0	0	0	11.5893	12.6105	13.5387	14.4887	15.6249	16.6051	17.5934
1	0	-0.25	-0.875	-1.5	-1	-1.25	-1.625	0	0	0	0	0	12.1725	13.1691	14.1273	15.1622	16.1013	17.1335	18.1109
1	-1.375	-2.875	-3.5	-4.25	-4.75	-5.375	-5.625	0	0	1	1	0	9.66735	10.6475	11.6222	12.6598	13.6372	14.6557	15.6632
2	0.5	-0.625	-1	-1.5	-1.25	-1.25	-1.375	0	0	0	0	0	10.1109	11.05	12.0411	13.0103	14.0479	15.0554	16.0383
2	0.25		-0.5	-0.75	-0.625	-0.75	-0.625	0	0	0	0	0	9.4538		11.3922	12.3888	13.4428	14.4832	15.4469
1	-1.625		-2.375	-2.875	-3.625			0	0	0	0	0	13.9138		15.8823	16.8186	17.9493
2	0.875	1	0.25	-0.25	0	0.125		0	0	0	0	0	13.922	14.9049	15.8823	16.9665	17.9931	18.9295
1	-0.005	-1.5	-2.5	-2.75	-2.625		-3.5	0	0	0	0	0	11.1102	12.1013	13.0678	14.0288	15.0938		17.0623
1	-0.5	-0.75	-1.25	-2	-2.5	-3		0	0	0	0	0	13.1828	14.1519	15.1348	16.0794	17.1198	18.1383
1	0.625	0.625	-0.375	0	-0.125	0	-0.5	0	0	0	0	0	10.6557	11.6359	12.6133	13.5934	14.642	15.7344	16.6981
2	0.435		-0.25		-0.125	-0.375	-0.75	0	0	0	0	0	11.0691		13.024		15.0856	16.0465	17.0623
2	-0.875	-1.25	-2	-2.25	-2.625	-2.25	-1.875	0	0	0	0	0	14.1027	15.1047	16.0712	17.0048	18.0342	19.0335	20.115
2	-1.75	-2.5	-3.25	-3.75	-4.25	-4.625	-4.625	0	0	0	1	0	11.6742	12.6297	13.6099	14.5818	15.5811	16.6242	17.6071
1	0.75	0.375	-1	-1.25	-2	-2.5	-3	0	0	0	0	0	9.53867	10.4805	11.4908	12.449	13.5003	14.5599	15.4771
1	-1	-1.5	-2.375	-3	-3	-3.125	-3.75	0	0	0	1	0	9.16633	10.1848	11.1622	12.0931	13.1444	14.1383	15.1348
2	-1.25	-1.625	-2.25	-2.75	-2.625	-2.75	-3	0	0	0	0	0	13.8125	14.8474	15.7509	16.7255	17.7714	18.8282	19.7645
1	0	0.25	-1.375	-3.25	-4.25	-4.75	-5.375	0	0	0	0	0	9.41547	10.3929	11.3703	12.3532	13.358	14.3737	15.3703
1	-4.875	-5.875	-6.75	-7	-6.75			1	1	1	1	1	12.6708	13.6482	14.6256	15.5811	16.6187
2	-0.62	-1	-1.625	-1.75	-2.25	-3.25	-4	0	0	0	1	0	10.883	11.8412	12.8433	13.8234	14.8337	15.8659	16.8378
2	0.44	0.625	-2.5	-0.75	-0.75	0		0	0	0	0	0	11.9617	12.9446	13.922	14.8747	15.9014	16.9555
2	-1.625	-2.125	-2.375	-2.75	-2.875	-2.875	-3.25	0	0	0	1	0	10.0014	10.9733	11.9644	12.9391	13.9822	14.9678	15.9808
1	-5.12	-5.5	-6.875	-6.875	-7.125	-7.25	-7.5	0	1	1	1	1	13.9658	14.9487	15.937	16.9227	17.911	18.9322	20.011
2	1.25	1	1	0.5	0.5	0.5	-0.5	0	0	0	0	0	9.34702	10.3217	11.2745	12.2601	13.2731	14.3463	15.2854
2	0.12	-1.125	-2.25	-3	-2.75	-3.25	-3.5	0	0	0	1	0	9.67009	10.6995	11.6988	12.6489	13.7933	14.7214	15.6715
1	0.5	0.75	0.875	0.625	0.625	0.75	0.75	0	0	0	0	0	13.4593	14.5024	15.4086	16.3888	17.3853	18.4367	19.4689
2	-0.935	-2.125	-3	-3.5	-3.875	-4.25	-4.75	0	0	0	1	0	10.5599	11.5893	12.5667	13.5359	14.5845	15.5921	16.575
1	0.19	0	-0.5	-1.25	-1.75		-2.75	0	0	0	0	0	9.56058	10.6585	11.551	12.5531	13.5578		15.5811
2	-4.5	-4.5	-5	-5.125	-5			0	1	1	1	0	13.7276	14.7625	15.7426	16.7365	17.7522
1	0.625	0.75	0.25		0.5		1	0	0	0	0	0	13.5414	14.5298	15.5647		17.6071		19.5839
1	-0.375	-1	-2.125	-3	-3.5	-3.5	-4.125	0	0	0	1	0	9.40452	10.4476	11.4278	12.4025	13.399	14.4504	15.4141
1	1.5	1.25	1.25	1.125	1.5	1	1.125	0	0	0	0	0	9.00753	10.0835	11.0719	12.0082	13.0897	14.0862	15.091
1	0.5	0.25	0	0.25	0.25	0.25	-0.125	0	0	0	0	0	13.0815	14.1218	15.102	16.0575	17.0869	18.1027	19.0856
1	-1.125		-1.375	-1.625	-1.5			0	0	0	0	0	13.8727		15.8878	16.9007	17.9357
2	3.81	3.875	3.875	4	4	4.25	4	0	0	0	0	0	13.8262	14.8337	15.8494	16.7967	17.8426	18.9049	19.822
1	1	1.25	0.75	0.375				0	0	0	0	0	12.4736	13.4428	14.4175	15.5099
1	-2.185	-3	-3.375	-4.125	-4.875	-5.375	-5.75	0	0	1	1	0	9.22382	10.2587	11.2115	12.2163	13.2129	14.2505	15.2635
1	0.435	0.125	-0.375	-1.25	-2.5	-2.875	-3.5	0	0	0	0	0	11.4278	12.4572	13.4346	14.4011	15.4114	16.4545	17.4237
2	-0.125	-1.25	-2.5	-3	-3.75	-4		0	0	0	0	0	10.2314	11.258	12.2245	13.2101	14.2478	15.3101
1	1	0.875	0.625	0.25	0.5	0	-0.375	0	0	0	0	0	10.3792	11.4223	12.3696	13.358	14.3984	15.4469	16.3724
2	-1.25	-1.5	-1.75		-2.375	-2.25	-1.75	0	0	0	0	0	13.5743	14.6119	15.5866		17.5797	18.6256	19.6413
2	0.87	1.5	1.125	0.75		0.625		0	0	0	0	0	10.6913	11.7837	12.6954	13.6646		15.7892
1	0.5	0	0.25	0.5	0			0	0	0	0	0	14.7625	15.7837	16.7556	17.7221	18.768
2	-1.245		-3.125	-4	-4.125	-4.75	-5	0	0	0	1	0	9.51129		11.5482	12.5667	13.577	14.5517	15.5537
2	0.56	-0.125	-0.625		-0.625	-0.875		0	0	0	0	0	13.1718	14.2149	15.1814		17.2129	18.2423
2	-1.245	-2.25	-3.625	-4		-4.25	-4.5	0	0	0	1	0	9.19097	10.2532	11.1923	12.1533		14.1821	15.1786
1	0.12	0.125	-0.375	-0.25	-0.125	-0.125		0	0	0	0	0	11.0116	12.0548	13.0459	13.9849	15.0828	16.0684
1	-3.5	-3.875	-4.5	-4.625	-4.75	-5		0	0	1	1	0	13.8919	14.8994	15.885	16.8652	17.859	18.9624
1	-0.305	-0.625	-1.25	-1.25	-1.25	-1.875	-2.125	0	0	0	1	0	9.93566	10.9432	11.885	12.8898	13.9247	14.9405	15.9562
2	0.62	-0.25	-0.75	-1	-1.25	-0.625	-0.5	0	0	0	0	0	10.4285	11.4524	12.4408	13.4346	14.4148	15.4743	16.5092
2	-2.055	-2.5	-3	-3.25	-3.875	-3.375	-3.625	0	0	0	1	0	13.8344	14.8528	15.7892	16.8706	17.8426	18.82	19.8741
1	1.685	1.375	1.375	1.375	1	1.125	1.375	0	0	0	0	0	11.1348	12.219	13.1444	14.0835	15.154	16.1643	17.2047
1	-0.125	-0.25	-1.125	-1.5	-2	-2.625	-2.625	0	0	0	0	0	10.6639	11.7235	12.6461	13.6153	14.6064	15.7016	16.7036
1	-0.555	-1.375	-1.25	-1.75	-1.75		-2.125	0	0	0	0	0	13.2074	14.2396	15.2115	16.1889	17.2266		19.3101
2	1.125	1	0.75	0.5	0.5	0.75	-0.125	0	0	0	0	0	9.0486	10.0643	11.0582	12.0109	13.0185	14.0342	15.0691
1	-1.055	-1.875	-2.5	-2.5	-2.875		-3.75	0	0	0	1	0	11.6742	12.7091	13.6646	14.6365	15.6687		17.7084
2	0.435	0.125	-0.75	-0.625	-0.875			0	0	0	0	0	11.6468	12.7283	13.6482	14.6365	15.6605
2	-1.375	-2	-1.75	-1.875	-1.625	-1.375	-1.25	0	0	0	0	0	13.6537	14.6858	15.6605	16.6078	17.6537	18.6886	19.6359
1	-1.935	-2	-2.875	-3.125	-3.125	-2.875	-2.875	0	0	0	1	0	13.7905	14.8282	15.8686	16.8487	17.7687	18.7762	19.7728
1	0	0	-0.375	-0.5		-0.5		0	0	0	0	0	12.6762	13.7084	14.7789	15.6578		17.7714
1	-0.805	-1.5	-1.875	-2.25	-2.375	-2.875	-3.25	0	0	0	1	0	9.56331	10.5955	11.551	12.5585	13.5305	14.5818	15.54
2	-1.745	-2.25	-2.75	-3.5	-4			0	0	0	1	0	13.0842	14.1191	15.0719	16.0684	17.0541
2	1.5	1.25	1	0.75	0.875	0.75	0.375	0	0	0	0	0	10.1793	11.1513	12.1889	13.065	14.1355	15.1677	16.0986
1	-0.81	-1.25	-1.75	-1.625	-2	-2.25		0	0	0	1	0	10.4832	11.5181	12.4983	13.4511	14.4586	15.4798
1	1.12	1	-1.25	0.625	0.875		0.875	0	0	0	0	0	9.03217	10.0725	11.05	11.9918	13.0815		15.0034
2	1	1.25	1	0.875	0.5	0.75		0	0	0	0	0	12.7529	13.7248	14.6804	15.6632	16.679	17.7139
2	0.94	0.75	0.25		0.25	0.5	-0.5	0	0	0	0	0	11.5619	12.5941	13.5743		15.5893	16.6434	17.5825
1	0.25	-0.5	-0.875	-1.875	-1.875	-2.25	-2.875	0	0	0	0	0	12.7064	13.6783	14.6475	15.603	16.6215	17.6646	18.6639
2	0.245	0.125	-0.25	-1	-1.25	-1.5	-2	0	0	0	0	0	10.36	11.384	12.3258	13.3251	14.3381	15.3292	16.3778
2	-0.5	-1.375	-1.25	-1.875	-1.875	-2.125		0	0	0	0	0	13.0349	14.0342	15.0363	15.9425	17.0048	18.0123
1	-0.19	-0.25	-0.375	-0.5	-1		-0.75	0	0	0	0	0	13.7933	14.757	15.7947	16.7392	17.7632		19.8439
2	-2.625	-2.5	-2.625	-3.25	-3.375	-2.75	-2.625	0	0	0	1	0	13.7604	14.7269	15.666	16.7009	17.6646	18.6968	19.7262
2	-0.375	-1.625	-3.375	-4	-4.375	-4.75	-4.875	0	0	0	0	0	11.7317		13.6318	14.6283	15.6687	16.6762	17.6893
1	1.065	0.625	0.75	0.25	-0.375	-0.5	-1.125	0	0	0	0	0	10.1081	11.1294	12.0849	13.0541	14.0972	15.0992	16.0767
1	0.75	0.875	0.625	0.25	-0.125	-0.125	-0.125	0	0	0	0	0	11.948	12.9363	13.9083	14.8556	15.9425	16.9144	17.9576
2	0.25	-0.125	-0.125	-0.75	-0.375	-1.125	-0.875	0	0	0	0	0	12.8186	13.8535	14.7433	15.7289	16.7885	17.8672	18.8036
2	-3	-4	-4.75	-5.5	-5.5	-5.75	-6	1	1	1	1	1	9.81246	10.7844	11.7426	12.7255	13.7303	14.7652	15.7673
2	0.185	-0.375	-1.5	-2.25	-2.75	-3.125	-4	0	0	0	0	0	9.22656	10.2505	11.206	12.1916	13.2567	14.2122	15.217
2			0.25	-0.75	-1.5		-2.75	0	0	0	0	0			13.7851	14.7598	15.7755		17.8344
1	-0.125	-0.5	-1	-1	-1.625	-2.375	-3	0	0	0	0	0	10.3299	11.3456	12.3012	13.3771	14.3436	15.3402	16.3121
2	-0.625	-1.125	-1.875	-1.75	-1.75	-2.125	-2.875	0	0	0	1	0	11.6331	12.6626	13.5825	14.59	15.5784	16.5941	17.6126
1	0.75	0.5	0.25	0.125	0.25	0	-0.625	0	0	0	0	0	10.2943	11.3238	12.2218	13.2183	14.2724	15.3183	16.2519
2	-1.13	-2	-2	-2.875	-3.375	-4	-4.75	0	0	1	1	0	12.7995	13.8179	14.7707	15.7399	16.8022	17.7878	18.872
1	0.185	0.375	0.375	0.375	0.625	0.5	0.25	0	0	0	0	0	9.5551	10.5736	11.5373	12.5147	13.514	14.5489	15.5236
2	-2.75	-2.875	-4	-4.75	-3.875	-3.625		0	0	0	1	0	12.8214	13.8344	14.7159	15.7125	16.8077	17.8371
1	0.44	0.375	-0.75	-1.5	-2.25	-2.625	-3.25	0	0	0	1	0	9.77687	10.8419	11.7235	12.7392	13.7358	14.768	15.77
2	-2.06	-2.75	-4.375	-5.375	-6.125	-6.875	-6.75	0	1	1	1	1	9.93566	10.9569	11.9042	12.8706	13.8919	14.9678	15.9644
2	0.185	-0.5	-1.125	-1.75	-2	-2.25	-2.25	0	0	0	0	0	10.0479	11.0609	11.9945	12.9747	13.9877	15.0198	16.0027
2	0.565	0.75	-0.25	-0.25	-0.75	-1	-1.875	0	0	0	0	0	9.62355	10.6338	11.5893	12.5531	13.6099	14.5599	15.6824
2	-0.935	-1.875	-2.75	-3.375	-2.875	-2.5	-3	0	0	0	0	0	12.2546	13.2348	14.2231	15.1786	16.2519	17.191	18.2067
1	0.995	1	0.875	0.375	0.5	0.75		0	0	0	0	0	10.8063	11.8166	12.7666	13.7686	14.8556	15.7974
1	1.06	1	0.5	0	-0.75	-1	-1.75	0	0	0	0	0	11.8138	12.8378	13.7741	14.7789	15.7454	16.7858	17.7741
1	-0.875	-1.75	-2.625	-3.5	-3.875		-4.125	0	0	0	1	0	9.39904	10.3901	11.3374	12.3888	13.3881		15.3785
1	0.31	0.25	-0.25	-0.75	-0.375			0	0	0	0	0	12.178	13.1937	14.1492	15.1485	16.1862
1	0.56	-0.25	-1.25	-1.5	-2.375	-2.75	-3.375	0	0	0	0	0	9.32512	10.3025	11.2663	12.2902	13.2594	14.3162	15.2882
2	0.75	0.5	0	-0.375	-1.125		-1.25	0	0	0	0	0	11.2553	12.2656	13.1855	14.2177	15.2416		17.243
2	-2.5	-2.875	-3.625	-3.625	-4		-3.625	0	0	0	1	0	14.1218	15.1294	16.0986	17.0869	18.0753		20.0739
2	-4.43	-5	-5.25	-6.25	-6.25	-6.625	-6.625	1	1	1	1	1	11.9726	13.024	13.9411	14.935	15.948	16.9911	17.9439
1	-0.93	-1.125	-1.375	-2	-1.875	-2.5		0	0	0	1	0	10.809	11.8166	12.742	13.7385	14.7515	15.7563
2	-0.38	-1	-1.25	-1.875	-1.5	-1.75	-2.375	0	0	0	0	0	12.0876	13.1034	14.0205	15.0554	16.063	17.065	18.0534
2	-5.125	-6.25	-5.875	-6	-5.875	-5.875	-5.625	1	1	1	1	1	12.7666	13.7604	14.757	15.7153	16.7803	17.7194	18.7625
2	0.125	-0.25	-0.5	-0.5	-0.5	-0.75	-1.625	0	0	0	0	0	11.1239	12.1698	13.0623	14.0397	15.0691	16.1342	17.117
1	-1.75	-2.5	-3.625	-4	-5.25	-5.75	-5.875	0	0	0	1	0	10.9268	11.9315	12.8597	13.8699	14.976	15.9042	16.909
2	-0.5	-0.25	-0.5	-0.5			0.25	0	0	0	0	0	13.9275	14.9322	15.8768	16.8597			19.9261
2	-3		-4.375	-5.25	-6.125		-6.375	0	0	1	1	0	12.4189		14.3765	15.3347	16.3806		18.3655
2	0.75	0.75	0.25	-0.5	-1.5	-2.5	-3	0	0	0	0	0	9.15537	10.1574	11.102	12.1889	13.1307	14.1246	15.0883
2	-0.75	-1.25	-1.375	-1.125				0	0	0	0	0	13.4045	14.4093	15.3785	16.3559
1	-1.25	-1.875	-2.625	-3	-3.25	-2.875	-3.625	0	0	0	0	0	12.4545	13.4866	14.4066	15.3648	16.46	17.4401	18.3984
1	-1.5	-1.75	-2.25	-2.25	-2.25	-1.875	-2	0	0	0	1	0	11.8878	12.8296	13.7988	14.8775	15.8549	16.8788	17.8234
1	-0.75	-0.375	-0.625	-0.875				0	0	0	0	0	14.5927	15.5838	16.5394	17.5359
1	0.5	0.25	-0.5	-0.625	-0.375	-0.25		0	0	0	0	0	10.6886	11.7043	12.6516	13.6509	14.7023	15.6879
1	-0.125	-0.625	-1.25	-1.125	-1.25	-1.875		0	0	0	0	0	10.5845	11.5537	12.5065	13.4784	14.4997	15.4962
2	0.375	0.25	0.06	-0.5	-0.25	-0.125		0	0	0	0	0	13.4045	14.4148	15.3292	16.4216	17.3196	18.2998
2	1.125	0.25	-0.25	-0.625	-0.25	-0.5		0	1	1	1	0	12.8734	13.8125	14.8036	15.7974	16.7912	17.8973
2	-2.75	-3.875	-4.625	-5.375	-5.5	-5.875	-5.5	0	0	0	1	0	12.2026	13.1389	14.0917	15.1321	16.104	17.1116	18.1136
1	0	-0.625	-0.75	-0.375	-0.25	-0.125	-0.375	0	0	0	0	0	14.1437	15.1157	16.0301	17.0623	18.0725	19.0828	20.0493
1	0	0	-0.125	0.25	-0.75	-0.75		0	0	0	0	0	12.9719	13.8891	14.8583	15.9425	16.9035	17.9603
2	-5.495	-5.5	-5.875	-5.625	-5.625	-5.625	-5.75	1	1	1	1	0	13.9795	14.9487	15.8631	16.8761	17.8891	18.9651	19.9179
1	-1.055	-2.25	-3	-3.375	-3.625	-3.625		0	0	0	1	0	11.8138	12.7775	13.7385	14.7159	15.7235	16.7474
1	-1.5		-3	-3.625	-4.25	-4.125	-4	0	0	0	1	0	11.9206		13.8097	14.8008	15.8275	16.8624	17.8344
2	-0.25	-0.75	-1.75	-2.75	-3	-3	-3.75	0	0	0	1	0	9.24025	10.1492	11.165	12.1396	13.18	14.1985	15.1759
2	-3.875	-4.75	-5	-5	-5.125	-5.125		0	0	1	1	0	13.8727	14.8611	15.7481	16.7803	17.7577	18.861
2	0.5	0.25	-0.5	-1	-1.75	-1.625	-2.25	0	0	0	0	0	9.70568	10.6995	11.6578	12.6188	13.6345	14.653	15.6523
2	0.75		0.125	-0.125	-0.125	-0.5	-0.375	0	0	0	0	0	11.039		12.9446	13.974	15.0034	15.9261	17.0486
2	0.75	1.125	0.625	0.25	0.5	0.75	0	0	0	0	0	0	11.7865	12.7474	13.6619	14.6941	15.6632	16.7803	17.7084
2	0.75	0	-0.875	-1.875	-1.75	-2.25	-2.375	0	0	0	0	0	10.4531	11.3758	12.3285	13.3251	14.4175	15.384	16.4271
2	-2.25	-3.125	-3.5	-3.25				0	0	0	1	0	13.6646	14.6639	15.5866	16.553
1	0.625	0.5	0.125	-0.5	-0.25			0	0	0	0	0	12.2245	13.1773	14.141	15.1075	16.1177
2	2.625	2.25	2	1.875	2.125	2.25	2	0	0	0	0	0	12.1533	13.1088	14.0233	15.0582	16.0767	17.0568	18.0424
2	-2.125	-3	-4	-4.125	-4.875	-4.625	-4.875	0	1	1	1	0	9.98768	10.9678	11.8823	12.8925	13.8836	14.9103	15.885
2	0.75	1	0.375	0.25	-0.375	-1.375	-2.125	0	0	0	0	0	9.77687	10.7242	11.6468	12.6845	13.6646	14.7187	15.6687
1	0.125	-0.25	-1.75	-3.375	-3.375	-3.625		0	0	0	0	0	11.3895	12.3203	13.2841	14.2697	15.269	16.3176
1	1.25	0.75	0.5	0.625	-0.125	-0.375	-0.75	0	0	0	0	0	9.577	10.5079	11.4524	12.5558	13.5907	14.5736	15.4962
1	1.25	1		0.75		0.75		0	0	0	0	0	14.7105	15.6578	16.5886	17.5934		19.6632
2	-2	-2.75	-3.75	-4	-4.25	-4.125	-4	0	0	0	1	0	12.3778	13.3059	14.245	15.2772	16.2574	17.2923	18.256
1	1.125	0.875	0.125	-0.75	-1.75	-2.625	-3.125	0	0	0	0	0	9.83162	10.7844	11.7454	12.7036	13.6975	14.7926	15.7372
1	-2.25	-2.5	-3.125					0	0	0	0	0	14.4148	15.332	16.3121
2	-3.25	-3.625	-4.5	-5.25	-5.5	-5.75	-5.625	0	0	1	1	0	12.6051	13.5551	14.5572	15.4606	16.4983	17.5195	18.5599
2	-2	-2.75	-3.625	-4	-4.625	-5.125	-5.5	0	0	1	1	0	9.7139	10.6393	11.603	12.6078	13.5989	14.6393	15.6058
2	-1.125	-1.625	-1.75	-1.5	-1			0	0	0	0	0	14.3135	15.2361	16.2327	17.1718	18.2615
2	-2.25			-2.5	-2	-2		0	0	0	1	0	12.449			15.3867	16.3504	17.4456
2	-3.5	-4.75	-5.5	-5.875	-6.375	-6.5	-6.625	0	0	1	1	0	12.6133	13.5168	14.4723	15.5045	16.4928	17.5277	18.4832
1	1.25	1.5	1.25	1	1.25			0	0	0	0	0	9.75222	10.7269	11.6112	12.6461	13.6235
1	-1.5	-2.625	-3	-3.5	-4.125	-4	-3.875	0	0	0	0	0	14.4093	15.332	16.2683	17.3005	18.3327	19.3155	20.3915
1	-4	-4.75	-5.125	-5.625	-6.25	-6.375	-6.5	1	1	1	1	1	10.6119	11.5921	12.5284	13.4565	14.4914	15.5318	16.575
1	0.25	0	0.5	0	-0.125	-0.25		0	0	0	0	0	14.4586	15.3621	16.3942	17.347	18.3162	19.3374
2	1.125	0.875		0.75	0.5	0.875		0	0	0	0	0	11.6003	12.5777		14.5763	15.54	16.5394
2	1.25	0.625	0.25	0.25	0.125			0	0	0	0	0	12.3094	13.1992	14.1766	15.2498	16.3148
2	-0.125		-0.5	-1	-0.875	-1	-1.75	0	0	0	0	0	12.6379		14.4997	15.5784	16.5038	17.5633	18.5051
1		1.125	0.875	0.875	0.625	0.625		0	0	0	0	0		11.7235	12.627	13.6318	14.6639	15.7125
2			-0.625	-1.125	-1.625	-1.875	-2.625	0	0	0	0	0			11.6906	12.6434	13.6427	14.6804	15.655
1				0.25	0.25			0	0	0	0	0				15.0609	16.1506
1			-5.125	-5.375	-6.75	-7	-6.5	0	1	1	1	1			14.7871	15.7344	16.7721	17.7769	18.7625
2			0	-0.875	-1	-1.25	-2.125	0	0	0	0	0			14.1054	15.039	16.0548	17.128	18.078
1			1	0.25	0.875	0.625		0	0	0	0	0			14.2067	15.165	16.1725	17.2211
2			-3	-3.875	-4	-4.375	-4.25	0	0	0	1	0			13.9932	14.935	15.9863	17.0596	17.9959
2			-1.625	-2.25	-2.5	-3.125	-3.25	0	0	0	0	0			12.8323	13.7796	14.8036	15.8357	16.8159
1			-1.5	-2.125	-3	-3	-3.75	0	0	0	0	0			12.6242	13.5442	14.5599	15.5811	16.5722
1			-2.875	-3.625	-3.375	-3.625	-4.125	0	0	1	1	0			12.9336	13.8919	14.8939	15.9151	16.9035
1			-0.375	-0.75	-1	-0.75	-0.875	0	0	0	0	0			12.2929	13.1937	14.2204	15.269	16.3066
1			3	3	2.875			0	0	0	0	0			13.8891	14.8392	15.8713
1				-1.75	-2	-2	-2.25	0	0	0	0	0				14.308	15.3238	16.3806	17.3443
1			-0.25	-1.125	-0.25	-0.125	-0.25	0	0	0	0	0			14.653	15.5784	16.5996	17.6071	18.6694
2				-0.125	0.25		0	0	0	0	0	0				15.5893	16.6078		18.6941
1			-0.25	-0.5	-0.25	-0.25	-0.75	0	0	0	0	0			14.5407	15.4716	16.5804	17.5086	18.5736
2			-2.25	-2	-2.5	-2.75	-3.125	0	0	0	0	0			15.0637	15.9945	17.0322	18.0479	19.0226
2			-3.25	-3.875	-4	-4.375	-5	0	0	1	1	0			11.6605	12.6188	13.6099	14.6201	15.6413
1			-2.375	-3	-3.375	-3.625	-4.375	0	0	0	1	0			13.9576	14.9103	15.9288	16.9473	17.9521
1				0.75	0.75	0.5	0.375	0	0	0	0	0				14.7406	15.8166	16.846	17.8699
1			-3.375	-4	-4.625	-4.5	-4.5	0	0	1	1	0			15.0883	16.0465	17.0596	18.0479	19.1513
1			-1	-1.25	-1	-0.25	-0.375	0	0	0	0	0			14.0452	14.9788	15.9918	16.9938	18.0534
2			1.25	1	1.25	1.25	1.25	0	0	0	0	0			12.5503	13.4921	14.5626	15.6194	16.5859
1			-1.625	-1.875	-2.5	-2.75	-3.625	0	0	0	1	0			12.0849	13.0568	14.0999	15.0554	16.0739
1			-2.375	-2.625	-2.5	-2.5	-2.625	0	0	0	1	0			14.7433	15.6852	16.7776	17.7495	18.7242
1			-1.875	-2	-2.25	-2.25	-2.625	0	0	0	0	0			15.4634	16.4435	17.4456	18.4778	19.4743
2			1.25		1.125	1.25	1.5	0	0	0	0	0			12.7639		14.8118	15.8111	16.8077
1			1	1	1.25			0	0	0	0	0			13.1253	14.0616	15.1294
2			-3	-3.625	-3.25			0	0	0	1	0			14.8392	15.7837	16.8405
1			-3.75	-4.625	-5.125	-5.75	-5.375	0	0	1	1	1			12.6817	13.629	14.6311	15.6331	16.6954
2			-3.75	-4.75	-5	-5.375	-5.5	0	0	1	1	0			12.5284	13.4839	14.4668	15.5045	16.5065
2			-5.375	-6.125	-6.375	-6.125	-6.25	0	0	1	1	0			15.1129	16.052	17.1143	18.1027	19.0801
2			-0.875	-1.375	-1.375	-1.375	-0.75	0	0	0	0	0			12.7803	13.7358	14.7598	15.7947	16.8049
2			-4.5	-4.875	-5	-5.125	-5.625	0	0	0	1	0			12.334	13.295	14.3025	15.3374	16.3203
2			-1.75	-2.5	-2.125	-1.875	-2.125	0	0	0	1	0			14.0643	15.0116	16.0821	17.076	18.0452
1			0.5		0.5	0.5		0	0	0	0	0			13.8015		15.7591	16.846
1			-0.375	-1.375	-2.25	-2.875	-3.875	0	0	0	0	0			12.6653	13.5688	14.5654	15.6085	16.6105
2				-0.25	-0.25	-0.25	-0.875	0	0	0	0	0				14.8857	15.9206	16.9117	17.9247
1			-0.25	-1.25	-1.375	-1.5	-1.75	0	0	0	0	0			12.8159	13.7166	14.7132	15.7454	16.7392
1			-1.5	-2.625	-3.625	-4.875	-5.625	0	0	0	1	0			11.3128	12.2026	13.2266	14.2587	15.2745
1			-0.875	-1.75	-1.875			0	0	0	0	0			13.9192	14.8036	15.833
1				4.5	4.75		5	0	0	0	0	0				12.1259	13.1718		15.1759
2				-0.25	-0.5	-0.625	-0.5	0	0	0	0	0				13.0541	14.1519	15.1458	16.115
1			-2.625	-3.75	-4.375	-4.25	-4.75	0	0	0	1	0			12.1752	13.0787	14.1136	15.1102	16.1232
1				-3.125	-3.625	-4.125	-5.125	0	0	1	1	0				13.0979	14.1492	15.1677	16.1451
1				0	-0.25	-0.125	-0.25	0	0	0	0	0				13.0513	14.0753	15.0773	16.0821
2			3.75	3.75	4	4	3.375	0	0	0	0	0			14.6585	15.5537	16.5968	17.6537	18.601
2			0.375	-0.125	-0.125	-0.375	0.125	0	0	0	0	0			11.6441	12.564	13.5879	14.6256	15.6249
2			-0.375	-0.625	-1.75			0	0	0	0	0			11.9535	12.8734	13.8672
1			-2.25	-3.125	-3.25	-3.25	-3.5	0	0	0	1	0			13.3005	14.1848	15.2389	16.2738	17.2348
1			-1.125	-1.875	-1.625	-1.75	-2.75	0	0	0	1	0			12.6598	13.5277	14.5435	15.5428	16.5558
1				0.5	0.5	0.125		0	0	0	0	0				12.9528	13.9877	15.0472
1			-3.25	-4	-4	-4.25	-4.875	0	0	0	1	0			14.7132	15.6359	16.6626	17.6537	18.6393
2				0.75	0.875			0	0	0	0	0				12.6489	13.6619
1				-4.25	-4.875	-5.25	-5	0	0	1	1	0				13.1499	14.2231	15.165	16.2409
2				-4		-5.25		0	0	1	1	0				13.5661		15.6331
2				0	-0.25	-0.5	-1.375	0	0	0	0	0				12.7721	13.7823	14.8172	15.7865
1			0.125		-0.75		-1.625	0	0	0	0	0			11.2005		13.2567		15.1951
1			0.625	0.625	0.5	0.75		0	0	0	0	0			13.7878	14.7242	15.7782	16.7912
1			0.5	-0.75	-2.25	-2.625	-2.75	0	0	0	0	0			13.3306	14.2697	15.3402	16.3039	17.3196
1				0.625	0.625	0.625	0.25	0	0	0	0	0				13.4018	14.4394	15.4114	16.449
1			-4.5	-4.375	-4.375		-4.875	0	0	1	1	0			13.1554	14.0205	15.0746		17.0596
2			-0.125	-0.375	-0.5	-0.5	-0.25	0	0	0	0	0			14.872	15.8084	16.8624	17.8864	18.8939
1			0.125	-0.75	-1.375	-1.75	-2.5	0	0	0	1	0			13.7413	14.7023	15.7125	16.7776	17.744
1			4	3	3.75			0	0	0	0	0			14.8446	15.7837	16.9363
1			1.625	1.5	0.625	0.5	-0.375	0	0	0	0	0			11.05	11.9891	12.9966	14.0014	15.0034
2			-2.25	-2.5	-2.625	-2.75	-3.5	0	0	0	1	0			11.9726	12.9418	13.9494	14.9624	15.9699
2			-2.75	-3.75	-4.5	-4.375	-4.875	0	0	1	1	0			11.7509	12.7173	13.8015	14.7899	15.7262
2				-3.375	-3.625	-3.75	-4.25	0	0	1	1	0				12.1478	13.1691	14.1958	15.1923
2			1	0.625	0.375		-0.625	0	0	0	0	0			11.7509	12.7775	13.8207		15.7645
1			-5.125	-5.75	-5.875	-6.75	-6.375	1	1	1	1	1			12.4162	13.3689	14.4476	15.4771	16.4545
2			-3.75	-4.125	-4.625	-4.75	-5	0	0	1	1	0			12.4901	13.4483	14.4805	15.4771	16.4819
1				-2.5	-2.75	-3	-4	0	0	0	0	0				14.8966	15.8932	16.8679	17.9138
2				-2	-2			0	0	0	0	0				14.4914	15.4908
1				-2		-2	-1.75	0	0	0	1	0				12.2929		14.2998	15.3758
2			-3.625	-4.125	-4.625	-4.75	-5	0	1	1	1	0			11.0883	11.9863	13.024	13.9904	15.0418
1			0.125	-0.875	-1.25	-1.625		0	0	0	0	0			12.3094	13.2485	14.3436	15.373
1			-1.25	-2	-2.25	-2.125	-2.375	0	0	0	0	0			13.7084	14.5845	15.6058	16.6379	17.6016
2			-0.75	-1.625	-2.875	-3	-4.125	0	0	0	1	0			11.8412	12.7556	13.7714	14.8118	15.7892
2				0.5	-0.125	-0.625	-1.25	0	0	0	0	0				12.6762	13.6126	14.6256	15.6058
1			1	-0.875	-2	-2.25	-3	0	0	0	0	0			12.3915	13.3224	14.4367	15.3566	16.3313
2			0.25	-0.375	-0.75	-1.5	-2.25	0	0	0	0	0			12.6571	13.5661	14.5791	15.6523	16.6078
1				-2.75	-3.375	-3.75		0	0	0	1	0				14.4832	15.499	16.5585
2				-1.625	-2.25	-3	-3.75	0	0	0	1	0				12.5859	13.6126	14.642	15.6249
2				-1.75	-2.25	-2.5	-3.25	0	0	0	0	0				14.2012	15.2088	16.2136	17.2101
2			-3.25	-4	-3.875	-3.75	-4	0	0	1	1	0			12.4736	13.4292	14.486	15.4743	16.4381
2			1.25	1.125	1.375			0	0	0	0	0			14.4613	15.3402	16.3942
2				-2.875	-3.25			0	0	0	0	0				14.7242	15.8439
2				-0.625	-0.25			0	0	0	0	0				14.5708	15.655
2				-2.625	-3.125	-3.25	-4	0	0	0	1	0				14.5435	15.5619	16.668	17.6071
2				-1.875	-2.125			0	0	0	0	0				15.1677	16.2136
1				-2	-2.5	-3.25	-4	0	0	0	0	0				15.0582	16.1451	17.1033	18.0945
1				-2.75	-2.625	-2	-2.5	0	0	0	1	0				14.9322	15.9535	17.024	17.9439
2				-2.375	-2.625	-2.875	-3	0	0	0	1	0				15.0007	16.0192	17.0486	18.037
2				-2.625	-2.375	-2.625	-2.625	0	0	0	0	0				14.9021	15.9535	16.9172	17.974
2					-4			0	0	1	1	0					15.8576
2				-0.5	-0.5	-1.25	-1.75	0	0	0	0	0				14.8008	15.8385	16.8542	17.8727
2				0.5	-0.375	-1	-1.125	0	0	0	0	0				13.5442	14.5763	15.6222	16.6023
2				-2.375	-2.25	-2.25	-3	0	0	0	1	0				14.4668	15.4743	16.501	17.4894
2				0.75	1	1.25	0.375	0	0	0	0	0				14.5134	15.5975	16.5722	17.5715
2				0	-0.5		-1.5	0	0	0	0	0				14.3847	15.4524		17.4538
2					-3.125	-3.75	-4	0	1	1	1	0					15.217	16.178	17.2676
2				-2.625	-3.25	-3.625	-3.75	0	0	0	1	0				13.9904	15.0034	16.011	16.9966
2				-4.375	-4.75	-4.5	-4.625	0	0	1	1	0				13.8371	14.8528	15.885	16.9062
1				-1.25	-1.75	-2	-2.75	0	0	0	0	0				12.7283	13.7331	14.8063	15.8029
1				0.5	0	-0.125	-0.625	0	0	0	0	0				12.7639	13.6975	14.7296	15.7481
1				2	1.5	1.5	1.25	0	0	0	0	0				12.7365	13.7851	14.8364	15.7591
1				-0.75	-0.5	-0.5	-0.375	0	0	0	0	0				12.679	13.7221	14.6995	15.7344
2				-4	-4.375	-4.875	-5	0	0	1	1	0				12.512	13.5606	14.5955	15.6058
2				-2	-1.75	-2.25	-2.25	0	0	0	1	0				13.4894	14.5654	15.54	16.5941
1				-1.25		-1.625	-2.5	0	0	0	0	0				13.191		15.2252	16.23
1				1	1.125		0.5	0	0	0	0	0				13.1499	14.1547		16.2053
2				-6.375		-6.25		1	1	1	1	1				13.2813		15.2909
2				-4	-4.5	-4.625	-4.75	0	0	1	1	0				12.8734	13.8809	14.8994	15.8795
2								0	0	0	0	0
1				-2.75	-3.25	-3.875	-4.25	0	0	1	1	0				12.5366	13.5879	14.6229	15.6194
1				-1.75	-2.125	-2	-2.625	0	0	0	0	0				12.3012	13.3717	14.4066	15.384
1				4.25	4.5	5	4.625	0	0	0	0	0				12.2902	13.3306	14.36	15.3402
2				-1.625	-2	-2	-2.25	0	0	0	1	0				12.2135	13.2348	14.3299	15.269
1				0.5	-0.625	-1.5	-2.5	0	0	0	0	0				12.1889	13.1828	14.2177	15.2197
1						-2.75	-3.625	0	0	0	0	0						14.0479	15.0007
2				-1.25	-1.875	-1.875	-2.5	0	0	0	0	0				13.4073	14.4641	15.4196	16.46
1					-3	-3.5	-4	0	0	0	1	0					14.8857	15.8878	16.8542
